# Supplementary material for: Spiro-centre substitution effects in the intramolecular spin–spin interactions of spirobiacridine diradicals
Source: Royal Society of Chemistry journal article supplement (doi:10.1039/d4qo00419a), 2024-01-01
Supplement: d4qo00419a1.pdf [file d4qo00419a1.pdf]

# **Spiro-centre substitution effects in intramolecular spin-spin interactions of spirobiacridine diradicals**

Shinichi Ogawa, Takuya Kanetomo\* and Masaya Enomoto\*

Department of Chemistry, Faculty of Science Division 1,  
Tokyo University of Science, 1-3 Kagurazaka, Shinjuku-ku, Tokyo, 162-8603, Japan

## Table of Contents

|                                                |             |
|------------------------------------------------|-------------|
| Materials and Methods                          | p. S2       |
| Synthesis                                      | pp. S3–S6   |
| ESR                                            | pp. S7–S8   |
| Single-Crystal X-ray Diffractions              | p. S9       |
| Theoretical calculations                       | pp. S10–S31 |
| Magnetic measurements                          | p. S32      |
| <sup>1</sup> H and <sup>13</sup> C NMR spectra | pp. S33–S38 |
| HRMS                                           | pp. S39–S42 |
| References                                     | p. S43      |

## Materials and Methods

Bis(4-*tert*-butylphenyl)amine was purchased from Tokyo Chemical Industry (TCI) Co., Ltd. Anhydrous *N,N'*-dimethylformamide (DMF) were used after distillation from a molecular sieve (4A). Dehydrated diethyl ether was purchased from KANTO Chemical Co., Inc. and used without further purification.  $^1\text{H}$  and  $^{13}\text{C}$  NMR experiments (400 and 100 MHz, respectively) were performed on an ECZ400S spectrometer (JEOL). The chemical shifts (given in ppm) were measured versus a reference peak of tetramethylsilane (TMS) in  $\text{CDCl}_3$  and  $\text{DMSO}-d_6$ . The splitting patterns are designated as follows: s (singlet), d (doublet), t (triplet), dd (doublet of doublets), and m (multiplet). Infrared (IR) spectra were obtained on an FT/IR-4600 (JASCO) spectrometer using a diamond attenuated total reflectance (ATR) method. The spectral data are obtained as major peaks in wavenumbers ( $\text{cm}^{-1}$ ) and recorded in a spectral window of 4000–400  $\text{cm}^{-1}$ . Mass spectra (MS) were recorded in an electrospray ionization (ESI) mode using an AccuTOF-JMS-T100LP (JEOL) spectrometer. The specimen was dissolved in methanol. The experimental data was calibrated by YOKUDELNA. Electronic spectra (ultraviolet–visible, UV–Vis) were obtained on a JASCO V-650 spectrometer. Electron spin resonance (ESR) spectra were recorded on a Bruker ELEXSYS X-band (9.3 GHz) spectrometer. The ESR spectra were recorded at room temperature (RT) after the sample solution in toluene was thoroughly purged with the  $\text{N}_2$  gas. Frozen solution ESR spectra were acquired after degassing with a freeze-thaw technique, and a cryostat (Oxford) was applied using liquid helium.

## Synthesis

**Synthesis of bis(2-bromo-4-*tert*-butylphenyl)amine (2).** Compounds bis(4-*tert*-butylphenyl)amine (11.26 g, 40.01 mmol) and ammonium acetate (0.74 g, 9.6 mmol) were dissolved in chloroform (160 mL). *N*-Bromosuccinimide

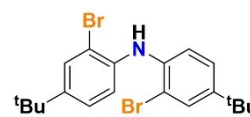

(14.90 g, 83.7 mmol) as powder was added to the reaction mixture for 10 minutes at RT. The mixture underwent stirring for 1 h. The reaction was terminated by the addition of saturated Na<sub>2</sub>S<sub>2</sub>O<sub>3</sub> aqueous solution, followed by sequential washing with saturated NaHCO<sub>3</sub> aqueous solution and brine. The organic layer was dried over anhydrous MgSO<sub>4</sub>, and the filtrate was concentrated under reduced pressure. The crude product purified by the recrystallization using ethanol, giving a pale yellow solid **2** (13.86 g, 31.55 mmol, 79%). Mp. 161–162 °C. <sup>1</sup>H NMR (400 MHz, CDCl<sub>3</sub>, Fig. S16): δ 7.56 (d, *J* = 1.4 Hz, 2H), 7.21 (dd, *J* = 8.7 and 1.8 Hz, 4H), 6.26 (s, 1H) and 1.30 (s, 18H). <sup>13</sup>C NMR (100 MHz, CDCl<sub>3</sub>, Fig. S17): δ 145.68, 137.74, 130.03, 125.06, 117.58, 113.94, 34.28 and 31.32. HRMS (ESI+, Fig. S28): *m/z* calcd. for C<sub>20</sub>H<sub>26</sub>Br<sub>2</sub>N [M+H]<sup>+</sup>: 440.04115, found: 440.04055. IR (ATR): 1517, 1497, 1331, 1258, 880, 812, 710, 600, 416 and 409 cm<sup>-1</sup>. UV-Vis (chloroform) λ<sub>max</sub>/nm (log ε) 290 (4.33).

**Synthesis of *N*-(4-methoxybenzyl)-bis(2-bromo-4-*tert*-butylphenyl)amine (3).** Compounds **2** (8.78 g, 20.0 mmol) and 60% NaH dispersion in paraffin liquid (1.20 g, 30 mmol) were stirred for 45 minutes in dried DMF solution (60 mL). After 4-methoxybenzyl chloride (4.1 mL,

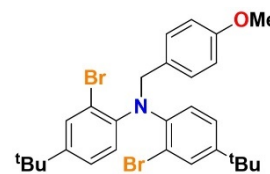

30 mmol) was added, the reaction mixture was stirred overnight. The reaction was quenched with water, and then the colourless solid was collected. From the recrystallization using ethanol, the colourless solid **3** was a yield of 10.20 g (18.23 mmol, 91%). Mp. 177–178 °C (decomp). <sup>1</sup>H NMR (400 MHz, CDCl<sub>3</sub>, Fig. S18): δ 7.54 (d, *J* = 2.3 Hz, 2H), 7.44 (d, *J* = 8.7 Hz, 2H), 7.13 (dd, *J* = 8.4 and 1.8 Hz, 2H), 6.85 (d, *J* = 8.2 Hz, 2H), 6.80 (d, *J* = 8.7 Hz, 2H), 4.70 (s, 2H), 3.75 (s, 3H) and 1.26 (s, 18H). <sup>13</sup>C NMR (100 MHz, CDCl<sub>3</sub>, Fig. S19): δ 158.4, 148.0, 144.5, 131.2, 130.2, 128.7, 124.7, 124.6, 120.9, 113.6, 56.2, 55.2, 34.3 and 31.2. HRMS (ESI+, Fig. S29): *m/z* calcd. for C<sub>28</sub>H<sub>33</sub>Br<sub>2</sub>NONa [M+Na]<sup>+</sup>: 580.08266, found: 580.08221. IR (ATR): 1508, 1497, 1483, 1257, 1240, 1222, 1170, 824, 816 and 613 cm<sup>-1</sup>. UV-Vis (chloroform) λ<sub>max</sub>/nm (log ε) 283 (4.25).

**Synthesis of 10,10'-bis(4-methoxybenzyl)-2,2',7,7'-tetra(*tert*-butyl)-9,9'-(10*H*,10'*H*)-spirobisilacridine (4-Si).** Compound **3** (3.92 g, 7.01 mmol) was dissolved in anhydrous diethyl ether (70 mL) under an Ar atmosphere. The solution was stirred for 1 h at –80 °C. After *n*-BuLi in *n*-hexane (1.57 mol L<sup>-1</sup>, 9.8 mL, 15.4 mmol) was added, the mixture was

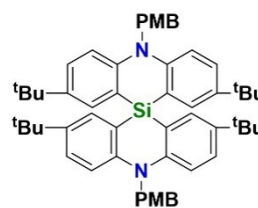

stirred for 15 minutes. The solution was stirred for 2 h at RT and then for 1 h at ice bath. Tetrachlorosilane (0.41 mL, 3.6 mmol) was added, the mixture was 15 minutes at ice bath and then

for 30 minutes at RT. The reaction mixture was refluxed overnight. The reaction was quenched with saturated NH<sub>4</sub>Cl aqueous solution. The collected solid was washed with water and diethyl ether to give the colourless solid **4-Si** (1.90 g, 2.30 mmol, 66%). Mp. > 300 °C. <sup>1</sup>H NMR (400 MHz, CDCl<sub>3</sub>, Fig. S20): δ 7.40 (d, *J* = 1.8 Hz, 4H), 7.29 (m, 8H), 6.95 (m, 8H), 5.29 (s, 4H), 3.83 (s, 6H) and 1.18 (s, 36H). <sup>13</sup>C NMR (100 MHz, CDCl<sub>3</sub>, Fig. S21): δ 158.47, 148.66, 142.22, 131.64, 130.46, 127.63, 127.43, 119.04, 115.48, 114.20, 55.49, 55.32, 33.96 and 31.36. HRMS (ESI+, Fig. S30): *m/z* calcd. for C<sub>56</sub>H<sub>66</sub>N<sub>2</sub>NaO<sub>2</sub>Si [M+Na]<sup>+</sup>: 849.47912, found: 849.48270. IR (ATR): 1510, 1458, 1451, 1398, 1240, 1223, 820, 565, 497 and 457 cm<sup>-1</sup>. UV-Vis (chloroform) λ<sub>max</sub>/nm (log ε) 286 (4.58).

**Synthesis of 10,10'-bis(4-methoxybenzyl)-2,2',7,7'-tetra(*tert*-butyl)-9,9'(10*H*,10'*H*)-spirobigermaacridine (4-Ge).**

Compound **3** (5.22 g, 9.33 mmol) was dissolved in anhydrous diethyl ether (50 mL) under the Ar atmosphere. The solution was stirred for 1 h at -80 °C. After *n*-BuLi in *n*-hexane (1.56 mol L<sup>-1</sup>, 13.2 mL, 20.6 mmol) was added, the mixture was stirred for 15 minutes. The solution was stirred for 2 h at RT and then for 1 h at ice bath. Tetrachlorogermane (1.0 g, 4.7 mmol) was added, the mixture was 15 minutes at ice bath and then for 30 minutes at RT. The reaction mixture was refluxed overnight. The reaction was quenched with saturated NH<sub>4</sub>Cl aqueous solution. The collected solid was washed with water and diethyl ether to give the colourless solid **4-Ge** (2.77 g, 3.18 mmol, 68%). Mp. > 300 °C. <sup>1</sup>H NMR (400 MHz, CDCl<sub>3</sub>, Fig. S22): δ 7.37 (d, *J* = 2.3 Hz, 4H), 7.32 (d, *J* = 8.2 Hz, 4H), 7.23 (dd, *J* = 8.7 and 2.7 Hz, 4H), 7.01 (d, *J* = 8.7 Hz, 4H), 6.91 (d, *J* = 8.7 Hz, 4H), 5.24 (s, 4H), 3.82 (s, 6H) and 1.19 (s, 36H). <sup>13</sup>C NMR (100 MHz, CDCl<sub>3</sub>, Fig. S23): δ 158.37, 148.54, 142.99, 131.13, 130.66, 127.66, 126.96, 121.97, 116.39, 114.11, 56.09, 55.30, 34.01 and 31.34. HRMS (ESI+, Fig. S31): *m/z* calcd. for C<sub>56</sub>H<sub>66</sub>GeN<sub>2</sub>NaO<sub>2</sub> [M+Na]<sup>+</sup>: 895.42338, found: 895.42003. IR (ATR): 1510, 1453, 1396, 1241, 1221, 1199, 1170, 1038, 820 and 445 cm<sup>-1</sup>. UV-Vis (chloroform) λ<sub>max</sub>/nm (log ε) 297 (4.38).

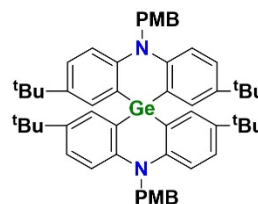

**Synthesis of 2,2',7,7'-tetra(*tert*-butyl)-9,9'(10*H*, 10'*H*)-spirobisilaacridine (5-Si).**

Compounds **4-Si** (827 mg, 1.00 mmol) and 90% 2,3-dichloro-5,6-dicyano-1,4-benzoquinone (DDQ, 555 mg, 2.20 mmol) were dissolved in toluene (10 mL). The mixture was stirred overnight at 40 °C. After the cooling to RT, the reaction was quenched with saturated NaHCO<sub>3</sub> aqueous solution. The organic layer was extracted by chloroform and washed with brine. The solution was dried over anhydrous MgSO<sub>4</sub>, and thus the filtrate was concentrated under reduced pressure. The black oil was purified by silica-gel column chromatography eluted with 2/3 chloroform/*n*-hexane, to afford a yellow solid **5-Si** (54.4 mg, 0.0927 mmol, 9%). Mp. 142–143 °C. <sup>1</sup>H NMR (400 MHz, DMSO-*d*<sub>6</sub>, Fig. S24): δ 9.21 (s, 2H), 7.35 (dd, *J* = 8.7 and 2.3 Hz, 4H), 7.06 (d, *J* = 8.7 Hz, 4H), 7.03 (d, *J* = 2.3 Hz, 4H) and

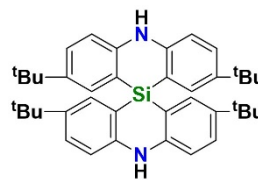

1.09 (s, 36H).  $^{13}\text{C}$  NMR (100 MHz,  $\text{CDCl}_3$ , Fig. S25):  $\delta$  145.08, 141.82, 132.68, 127.71, 115.05, 114.45, 34.01 and 31.40. HRMS (ESI+, Fig. S32):  $m/z$  calcd. for  $\text{C}_{40}\text{H}_{50}\text{N}_2\text{Si}$   $[\text{M}]^+$ : 586.37432, found: 586.37190. IR (ATR): 1601, 1456, 1359, 1237, 1120, 1083, 811, 523, 491 and  $462\text{ cm}^{-1}$ . UV-Vis (chloroform)  $\lambda_{\text{max}}/\text{nm}$  ( $\log \epsilon$ ) 285 (4.43).

**Synthesis of 2,2',7,7'-tetra(*tert*-butyl)-9,9'(10*H*,10'*H*)-**

**spirobigermaacridine (5-Ge).** Compounds **4-Ge** (436 mg, 0.50 mmol) and 90% DDQ (278 mg, 1.10 mmol) were dissolved in toluene (5 mL). The mixture was stirred overnight at  $40\text{ }^\circ\text{C}$ . After the cooling to RT, the reaction

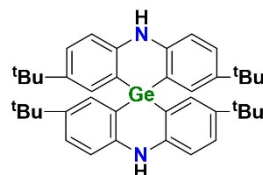

was quenched with saturated  $\text{NaHCO}_3$  aqueous solution. The organic layer was extracted by chloroform and washed with brine. The solution was dried over anhydrous  $\text{MgSO}_4$ , and thus the filtrate was concentrated under reduced pressure. The brown oil was purified by silica-gel column chromatography eluted with 2/1 chloroform/*n*-hexane, to afford a yellow solid **5-Ge** (115.7 mg, 0.183 mmol, 37%). Mp.  $170\text{--}171\text{ }^\circ\text{C}$ .  $^1\text{H}$  NMR (400 MHz,  $\text{DMSO-}d_6$ , Fig. S26):  $\delta$  8.96 (s, 2H), 7.31 (dd,  $J = 8.7$  and  $2.5$  Hz, 4H), 7.04 (d,  $J = 8.6$  Hz, 2H), 7.00 (d,  $J = 2.5$  Hz, 2H) and 1.10 (s, 36H).  $^{13}\text{C}$  NMR (100 MHz,  $\text{CDCl}_3$ , Fig. S27):  $\delta$  144.74, 142.36, 132.14, 127.18, 116.91, 114.75, 34.04 and 31.41. HRMS (ESI+, Fig. S33):  $m/z$  calcd. for  $\text{C}_{40}\text{H}_{50}\text{GeN}_2\text{Na}$   $[\text{M}+\text{Na}]^+$ : 655.30835, found: 655.30789. IR (ATR): 2953, 1598, 1461, 1389, 1359, 1320, 1271, 1234, 809 and  $446\text{ cm}^{-1}$ . UV-Vis (chloroform)  $\lambda_{\text{max}}/\text{nm}$  ( $\log \epsilon$ ) 288 (4.31).

**Synthesis of 2,2',7,7'-tetra(*tert*-butyl)-9,9'(10*H*,10'*H*)-**

**spirobisilaacridine-10,10'-dioxyl (1-Si).** Compound **5-Si** (54.4 mg, 0.093 mmol) was dissolved in chloroform (3 mL). The 65% *m*-chloroperbenzoic acid (*m*-CPBA, 152.0 mg, 0.573 mmol) dissolved in chloroform (7.5 mL) was added to at  $0\text{ }^\circ\text{C}$ , and the mixture was stirred for 4 h. The mixture was

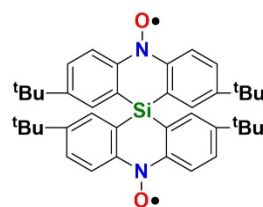

passed through the short column (activated aluminum, eluted with chloroform), and the filtrate was concentrated under reduced pressure. The brown solid was purified by silica-gel column chromatography eluted with 1/9 ethyl acetate/*n*-hexane, to afford dark brown solid. Recrystallization from  $\text{CH}_2\text{Cl}_2$  and *n*-hexane in a refrigerator gave dark red platelet crystals **1-Si** (6.8 mg, 0.011 mmol, 12%), which were subjected to analytical, structural and magnetic studies. Mp.  $208\text{--}209\text{ }^\circ\text{C}$ . HRMS (ESI+, Fig. S34):  $m/z$  calcd. for  $\text{C}_{40}\text{H}_{48}\text{N}_2\text{NaO}_2\text{Si}$   $[\text{M}+\text{Na}]^+$ : 639.33827, found: 639.33911. IR (ATR): 1388, 1350, 1261, 1127, 1119, 831, 775, 529, 502 and  $446\text{ cm}^{-1}$ . UV-Vis (chloroform)  $\lambda_{\text{max}}/\text{nm}$  ( $\log \epsilon$ ) 347 (4.50).

**Synthesis of 2,2',7,7'-tetra(*tert*-butyl)-9,9'(10*H*,10'*H*)-**

**spirobigermaacridine-10,10'-dioxyl (1-Ge).** Compound **5-Ge** (61.1 mg,

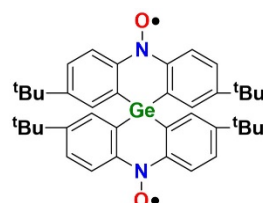

0.097 mmol) was dissolved in chloroform (3 mL). The 65% *m*-CPBA (154.1 mg, 0.580 mmol) dissolved in chloroform (7.5 mL) was added to at 0 °C, and the mixture was stirred for 3 h. The mixture was passed through the short column (activated aluminum, eluted with chloroform), and the filtrate was concentrated under reduced pressure. The brown solid was purified by silica-gel column chromatography eluted with 1/9 ethyl acetate/*n*-hexane, to afford dark brown solid. Recrystallization from CH<sub>2</sub>Cl<sub>2</sub> and *n*-hexane in a refrigerator gave dark red platelet crystals **1-Ge** (11.5 mg, 0.017 mmol, 18%), which were subjected to analytical, structural and magnetic studies. Mp. 217–218 °C. HRMS (ESI+, Fig. S35): *m/z* calcd. for C<sub>40</sub>H<sub>48</sub>GeN<sub>2</sub>NaO<sub>2</sub> [M+Na]<sup>+</sup>: 685.28253, found: 685.28575. IR (ATR): 2958, 1449, 1388, 1345, 1260, 1119, 828, 513, 448 and 439 cm<sup>-1</sup>. UV-Vis (chloroform) λ<sub>max</sub>/nm (log ε) 341 (4.67).

## ESR Studies

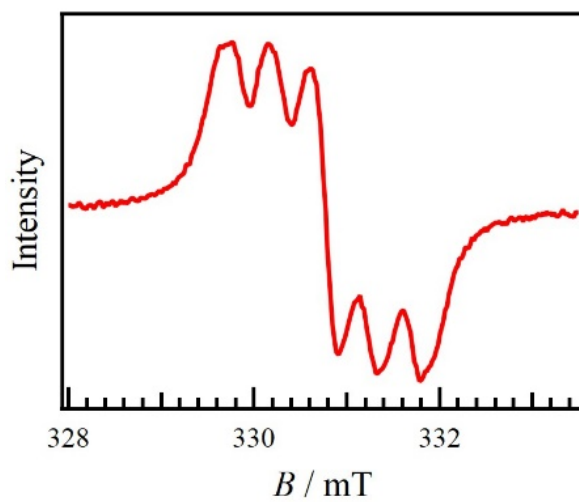

**Fig. S1.** X-Band ESR spectrum for **1-Si** in a degassed toluene solution at RT.

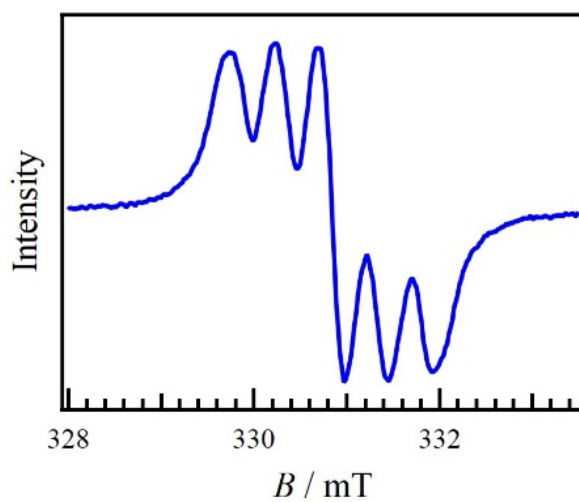

**Fig. S2.** X-Band ESR spectrum for **1-Ge** in a degassed toluene solution at RT.

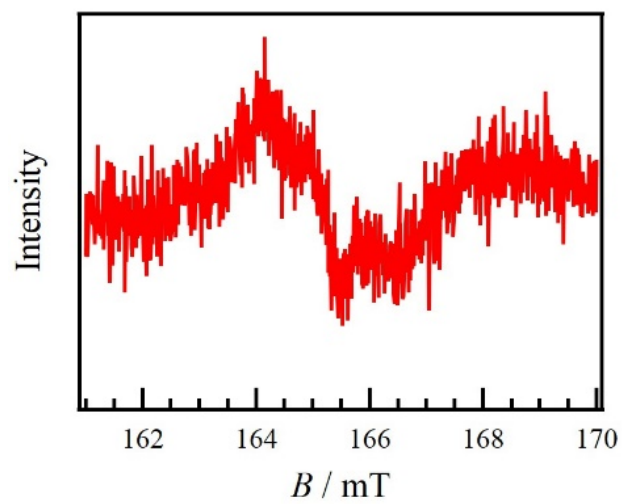

**Fig. S3.** Frozen-solution X-band ESR spectrum for **1-Si** in the degassed toluene solution at 40 K.

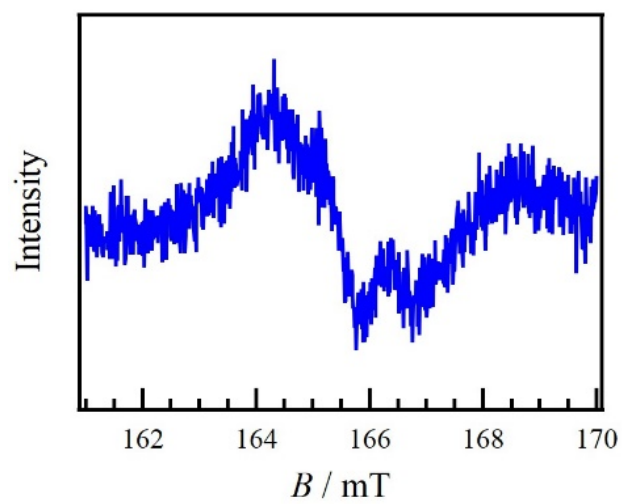

**Fig. S4.** Frozen-solution X-band ESR spectrum for **1-Ge** in the degassed toluene solution at 50 K.



### Single Crystal X-ray Diffractions

The X-ray diffraction data of **1-Si** and **1-Ge** at 93 K were collected on a Rigaku VariMax Dual (Mo K $\alpha$  radiation:  $\lambda = 0.71073$  Å). The selected crystallographic data are given in Table S1. X-ray data analyses were carried out using the SHELXT<sup>S1</sup> and SHELXL<sup>S2</sup> programs operated with the Olex2 interface.<sup>S3</sup> All the hydrogen atoms were refined as “riding”. The thermal displacement parameters of the non-hydrogen atoms were refined anisotropically. The CCDC numbers of **1-Si** and **1-Ge** are 2334921 and 2334922, respectively.

**Table S1.** Selected crystallographic data for **1-Si** and **1-Ge** (**1-C** as the reference).

|                                                                          | <b>1-Si</b>                                                                   | <b>1-Ge</b>                                                     | <b>1-C</b> <sup>a</sup>                                       |
|--------------------------------------------------------------------------|-------------------------------------------------------------------------------|-----------------------------------------------------------------|---------------------------------------------------------------|
| Formula                                                                  | C <sub>80</sub> H <sub>96</sub> N <sub>4</sub> O <sub>2</sub> Si <sub>2</sub> | C <sub>40</sub> H <sub>48</sub> GeN <sub>2</sub> O <sub>2</sub> | C <sub>41</sub> H <sub>48</sub> N <sub>2</sub> O <sub>2</sub> |
| Fw                                                                       | 1233.78                                                                       | 661.39                                                          | 600.84                                                        |
| T/K                                                                      | 93                                                                            | 93                                                              | 100                                                           |
| Crystal system                                                           | Triclinic                                                                     | Monoclinic                                                      | Monoclinic                                                    |
| Space group                                                              | <i>P</i> -1                                                                   | <i>P</i> 2 <sub>1</sub> / <i>n</i>                              | <i>P</i> 2 <sub>1</sub> / <i>n</i>                            |
| <i>a</i> /Å                                                              | 11.26630(10)                                                                  | 12.3869(3)                                                      | 10.794(2)                                                     |
| <i>b</i> /Å                                                              | 17.6483(2)                                                                    | 25.3893(5)                                                      | 19.316(4)                                                     |
| <i>c</i> /Å                                                              | 18.7120(3)                                                                    | 11.2881(3)                                                      | 16.518(3)                                                     |
| $\alpha$ /°                                                              | 90.8560(10)                                                                   | 90                                                              | 90                                                            |
| $\beta$ /°                                                               | 96.450(10)                                                                    | 105.385(3)                                                      | 90.760(11)                                                    |
| $\gamma$ /°                                                              | 107.5730(10)                                                                  | 90                                                              | 90                                                            |
| <i>V</i> /Å <sup>3</sup>                                                 | 3519.75(8)                                                                    | 3422.83(15)                                                     | 3443.6(12)                                                    |
| <i>Z</i>                                                                 | 2                                                                             | 4                                                               | 4                                                             |
| <i>d</i> <sub>calcd</sub> /g cm <sup>-3</sup>                            | 1.164                                                                         | 1.283                                                           | 1.159                                                         |
| $\mu$ /Mo K $\alpha$ /mm <sup>-1</sup>                                   | 0.103                                                                         | 0.932                                                           | 0.070                                                         |
| <i>R</i> ( <i>F</i> ) <sup>a</sup> ( <i>I</i> > 2 $\sigma$ ( <i>I</i> )) | 0.0371                                                                        | 0.0308                                                          | 0.0478                                                        |
| <i>R</i> <sub>w</sub> ( <i>F</i> <sup>2</sup> ) <sup>b</sup> (all data)  | 0.1024                                                                        | 0.0834                                                          | 0.1182                                                        |
| Goodness of fit                                                          | 1.035                                                                         | 1.037                                                           | 1.069                                                         |

<sup>a</sup> Ref. [S4]. <sup>b</sup>  $R = \sum ||F_o| - |F_c|| / \sum |F_o|$ . <sup>c</sup>  $R_w = [\sum w|F_o^2 - F_c^2|^2 / \sum w(F_o^2)^2]^{1/2}$ .

### Theoretical calculations

The DFT calculations of **1-Si-a**, **1-Si-b** and **1-Ge** were performed on the Gaussian09 program.<sup>S5</sup> The energies of the triplet (T) and broken-symmetry singlet (BS) states were calculated at the UB3LYP/6-311G+(2d,p) level. The structural parameters were given from the crystallographic data. The calculated spin densities of the T and BS states for **1-Si-a**, **1-Si-b** and **1-Ge** have been mapped onto the molecular skeleton shown in Figs. S5–S7, respectively. The triplet and singlet energy states for **1-Si-a**, **1-Si-b** and **1-Ge** are summarized in Tables S2–S4, respectively. Selected molecular orbitals of the ground triplet state ( $S = 1$ ) and  $\alpha$  and  $\beta$  spins for **1-Si-a**, **1-Si-b** and **1-Ge** with isovalue = 0.03 are shown in Tables S5–S7, respectively.

a)

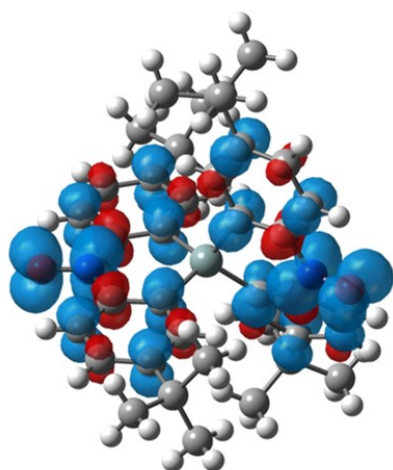

b)

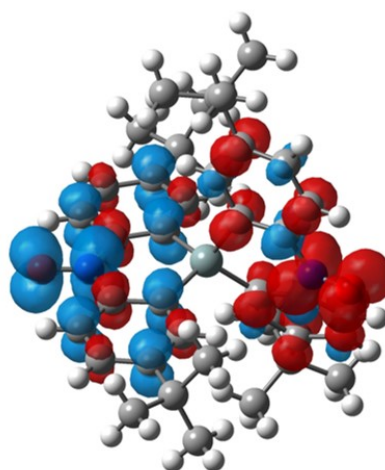

**Fig. S5.** Spin density maps drawn from the DFT MO calculations for **1-Si-a** with the (a) triplet and (b) singlet states. Blue and red lobes stand for positive and negative spin densities, respectively, with the isocontour of  $0.002 e \text{ \AA}^{-3}$ .

a)

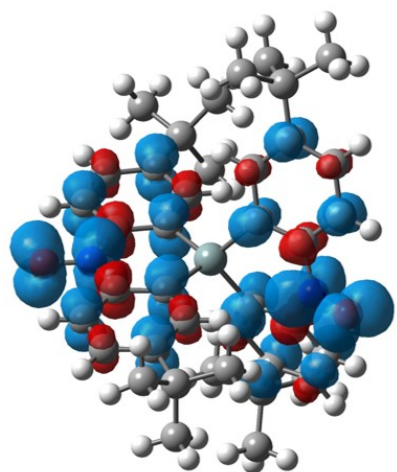

b)

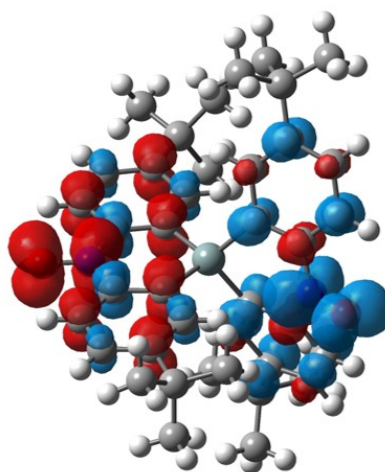

**Fig. S6.** Spin density maps drawn from the DFT MO calculations for **1-Si-b** with the (a) triplet and (b) singlet states. Blue and red lobes stand for positive and negative spin densities, respectively, with the isocontour of  $0.002 e \text{ \AA}^{-3}$ .

a)

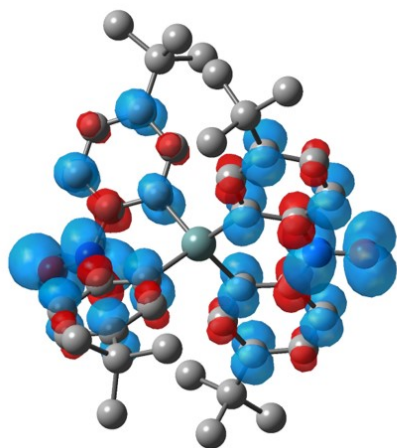

b)

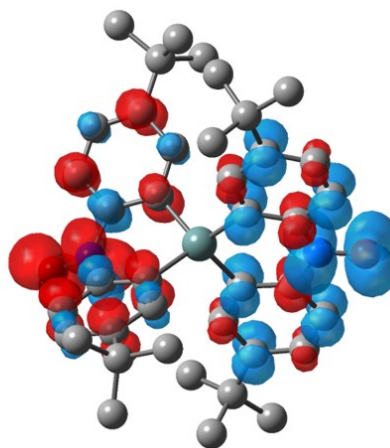

**Fig. S7.** Spin density maps drawn from the DFT MO calculations for **1-Ge** with the (a) triplet and (b) singlet states. Blue and red lobes stand for positive and negative spin densities, respectively, with the isocontour of  $0.002 e \text{ \AA}^{-3}$ .



**Table S2.** The energy levels and  $\langle S^2 \rangle$  in the triplet and singlet spin states for **1-Si-a**.

| Spin states       | $E / \text{au}$ | $\langle S^2 \rangle$ |
|-------------------|-----------------|-----------------------|
| $S = 1$ (triplet) | -2102.59121432  | 2.0005                |
| $S = 0$ (singlet) | -2102.59117798  | 0.2263                |

**Table S3.** The energy levels and  $\langle S^2 \rangle$  in the triplet and singlet spin states for **1-Si-b**.

| Spin states       | $E / \text{au}$ | $\langle S^2 \rangle$ |
|-------------------|-----------------|-----------------------|
| $S = 1$ (triplet) | -2102.59975232  | 2.0005                |
| $S = 0$ (singlet) | -2102.59972061  | 0.2210                |

**Table S4.** The energy levels and  $\langle S^2 \rangle$  in the triplet and singlet spin states for **1-Ge**.

| Spin states       | $E / \text{au}$ | $\langle S^2 \rangle$ |
|-------------------|-----------------|-----------------------|
| $S = 1$ (triplet) | -3889.84438544  | 2.0005                |
| $S = 0$ (singlet) | -3889.84434641  | 0.2170                |

**Table S5.** Selected molecular orbitals of the triplet state ( $S = 1$ ) and  $\alpha$  and  $\beta$  spins for **1-Si-a** (isovalue = 0.03). Red and blue filled cells represent the occupied and unoccupied MOs, respectively.

| MOs ( $\alpha$ spin) | $E / \text{eV}$  |                                                                                     | MOs ( $\beta$ spin) | $E / \text{eV}$ |                                                                                       |
|----------------------|------------------|-------------------------------------------------------------------------------------|---------------------|-----------------|---------------------------------------------------------------------------------------|
| 173                  | -0.379           | 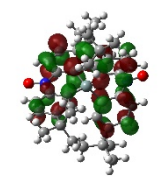   | 173                 | -0.251          |    |
| 172                  | -0.478           |    | 172                 | -0.391          |    |
| 171                  | -0.546           |    | 171                 | -0.444          |    |
| 170                  | -0.985           |   | 170                 | -0.909          |   |
| 169                  | -1.148           |  | 169                 | -1.091          |  |
| 168                  | -1.261           |  | 168                 | -1.197          |  |
| 167                  | -5.215<br>(SOMO) |  | 167                 | -2.727          |  |
| 166                  | -5.270<br>(SOMO) |  | 166                 | -2.769          |  |

|     |        |                                                                                     |     |        |                                                                                       |
|-----|--------|-------------------------------------------------------------------------------------|-----|--------|---------------------------------------------------------------------------------------|
| 165 | -6.877 | 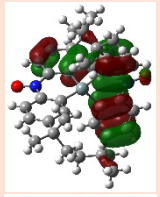   | 165 | -6.640 |    |
| 164 | -6.993 |    | 164 | -6.767 |    |
| 163 | -7.005 |    | 163 | -6.819 |    |
| 162 | -7.143 |   | 162 | -6.906 |   |
| 161 | -7.201 |  | 161 | -6.939 |  |
| 160 | -7.454 |  | 160 | -7.164 |  |
| 159 | -7.537 |  | 159 | -7.166 |  |
| 158 | -7.608 |  | 158 | -7.267 |  |
| 157 | -7.683 |  | 157 | -7.319 |  |

|     |        |  |     |        |  |
|-----|--------|--|-----|--------|--|
| 156 | -7.706 |  | 156 | -7.437 |  |
|-----|--------|--|-----|--------|--|

**Table S6.** Selected molecular orbitals of the triplet state ( $S = 1$ ) and  $\alpha$  and  $\beta$  spins for **1-Si-b** (isovalue = 0.03). Red and blue filled cells represent the occupied and unoccupied MOs, respectively.

| MOs ( $\alpha$ spin) | $E / \text{eV}$ |  | MOs ( $\beta$ spin) | $E / \text{eV}$ |  |
|----------------------|-----------------|--|---------------------|-----------------|--|
| 175                  | -0.093          |  | 175                 | 0.025           |  |
| 174                  | -0.217          |  | 174                 | -0.215          |  |
| 173                  | -0.377          |  | 173                 | -0.258          |  |
| 172                  | -0.464          |  | 172                 | -0.374          |  |
| 171                  | -0.524          |  | 171                 | -0.418          |  |
| 170                  | -0.976          |  | 170                 | -0.898          |  |
| 169                  | -1.140          |  | 169                 | -1.084          |  |



|     |                  |                                                                                     |     |        |                                                                                       |
|-----|------------------|-------------------------------------------------------------------------------------|-----|--------|---------------------------------------------------------------------------------------|
| 168 | -1.269           | 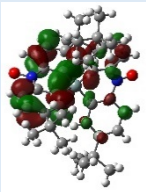   | 168 | -1.204 |    |
| 167 | -5.223<br>(SOMO) |    | 167 | -2.712 |    |
| 166 | -5.299<br>(SOMO) |    | 166 | -2.780 |    |
| 165 | -6.826           |   | 165 | -6.663 |   |
| 164 | -6.990           |  | 164 | -6.756 |  |
| 163 | -7.029           |  | 163 | -6.809 |  |
| 162 | -7.144           |  | 162 | -6.905 |  |
| 161 | -7.233           |  | 161 | -6.957 |  |
| 160 | -7.431           |  | 160 | -7.152 |  |

|     |        |                                                                                    |     |        |                                                                                      |
|-----|--------|------------------------------------------------------------------------------------|-----|--------|--------------------------------------------------------------------------------------|
| 159 | -7.544 | 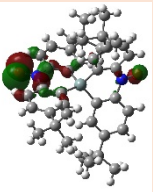  | 159 | -7.188 |   |
| 158 | -7.612 |   | 158 | -7.282 |   |
| 157 | -7.680 |   | 157 | -7.306 |   |
| 156 | -7.707 |  | 156 | -7.422 |  |

**Table S7.** Selected molecular orbitals of the triplet state ( $S = 1$ ) and  $\alpha$  and  $\beta$  spins for **1-Ge** (isovalue = 0.03). Red and blue filled cells represent the occupied and unoccupied MOs, respectively.

| MOs ( $\alpha$ spin) | $E / \text{eV}$ |                                                                                     | MOs ( $\beta$ spin) | $E / \text{eV}$ |                                                                                       |
|----------------------|-----------------|-------------------------------------------------------------------------------------|---------------------|-----------------|---------------------------------------------------------------------------------------|
| 184                  | -0.145          | 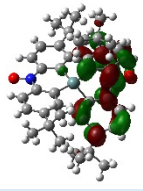 | 184                 | 0.003           |  |
| 183                  | -0.236          |  | 183                 | -0.233          |  |
| 182                  | -0.405          |  | 182                 | -0.295          |  |
| 181                  | -0.446          |  | 181                 | -0.365          |  |

|     |                  |                                                                                     |     |        |                                                                                       |
|-----|------------------|-------------------------------------------------------------------------------------|-----|--------|---------------------------------------------------------------------------------------|
| 180 | -0.548           | 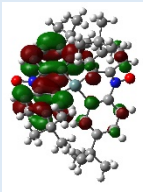   | 180 | -0.450 |    |
| 179 | -0.845           |    | 179 | -0.759 |    |
| 178 | -1.068           |    | 178 | -1.015 |    |
| 177 | -1.127           |   | 177 | -1.061 |   |
| 176 | -5.185<br>(SOMO) |  | 176 | -2.643 |  |
| 175 | -5.295<br>(SOMO) |  | 175 | -2.747 |  |
| 174 | -6.847           |  | 174 | -6.617 |  |
| 173 | -6.988           |  | 173 | -6.764 |  |
| 172 | -7.049           |  | 172 | -6.820 |  |

|     |        |                                                                                     |     |        |                                                                                       |
|-----|--------|-------------------------------------------------------------------------------------|-----|--------|---------------------------------------------------------------------------------------|
| 171 | -7.072 | 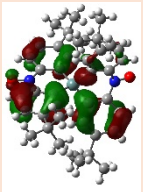   | 171 | -6.927 |    |
| 170 | -7.194 |    | 170 | -6.963 |    |
| 169 | -7.383 |    | 169 | -7.079 |    |
| 168 | -7.511 |   | 168 | -7.130 |   |
| 167 | -7.574 |  | 167 | -7.240 |  |
| 166 | -7.647 |  | 166 | -7.275 |  |
| 165 | -7.685 |  | 165 | -7.422 |  |

Compounds 9,9'(10*H*,10'*H*)spirobisilaacridine-10,10'-dioxyl (**SBDO-Si**) and 9,9'(10*H*,10'*H*)spirobigermaacridine-10,10'-dioxyl (**SBDO-Ge**), as model compounds to **1-Si** and **1-Ge**, and 9,9'(10*H*,10'*H*)spirobiacridine-10,10'-dioxyl (**SBDO-C**) were subjected to DFT calculations at the UB3LYP/6-311g+(2d,p) level, after the geometry was optimized at the UB3LYP/6-31g(d,p) level. The calculated spin densities of the T and BS states have been mapped onto the molecular skeleton shown in Figs. S8–S10. The triplet and singlet energy states for **SBDO-C**, **-Si** and **-Ge** are summarized in Tables S8–10, respectively. Selected molecular orbitals of the triplet state ( $S = 1$ ) and  $\alpha$  and  $\beta$  spins for **SBDO-C**, **-Si** and **-Ge** (isovalue = 0.03) are shown in Tables S11–S13.

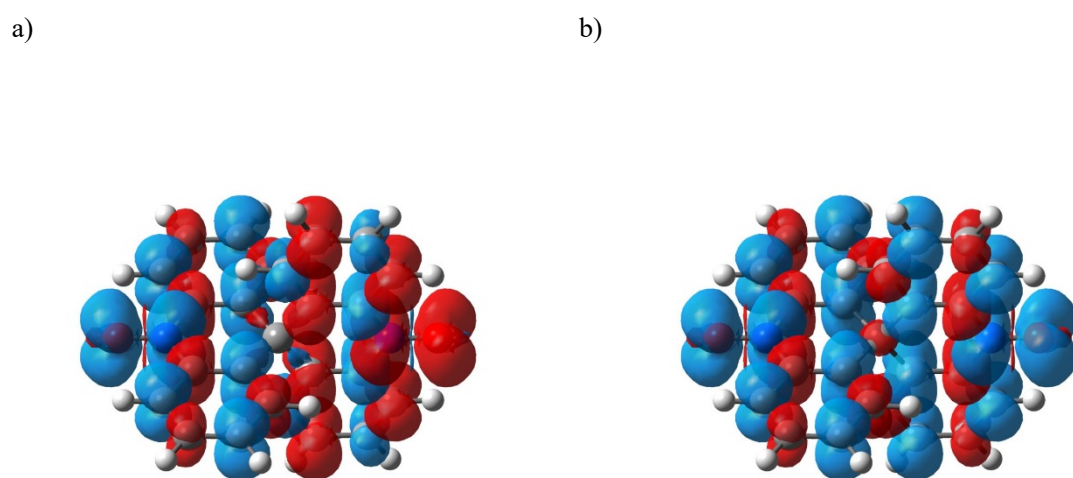

**Fig. S8.** Spin density maps drawn from the DFT MO calculations for **SBDO-C** with the (a) singlet and (b) triplet states. Blue and red lobes stand for positive and negative spin densities, respectively, with the isocontour of  $0.001 \text{ e } \text{\AA}^{-3}$ .

a)

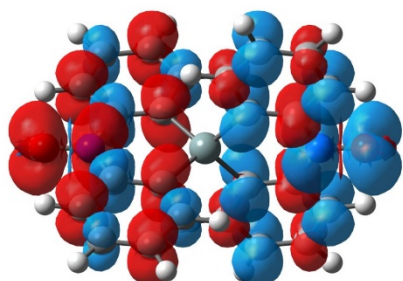

b)

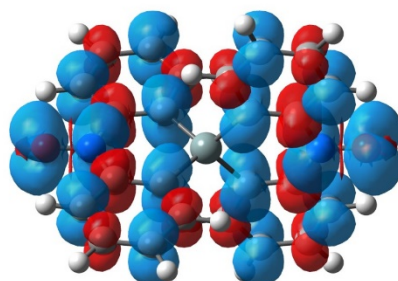

**Fig. S9.** Spin density maps drawn from the DFT MO calculations for **SBDO-Si** with the (a) singlet and (b) triplet states. Blue and red lobes stand for positive and negative spin densities, respectively, with the isocontour of  $0.001 \text{ e } \text{\AA}^{-3}$ .

a)

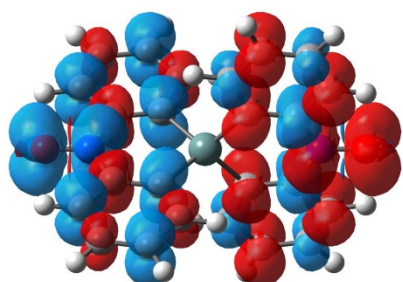

b)

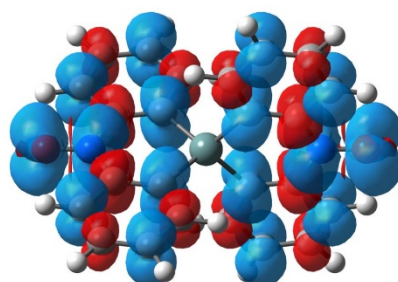

**Fig. S10.** Spin density maps drawn from the DFT MO calculations for **SBDO-Ge** with the (a) singlet and (b) triplet states. Blue and red lobes stand for positive and negative spin densities, respectively, with the isocontour of  $0.001 \text{ e } \text{\AA}^{-3}$ .

**Table S8.** The energy levels and  $\langle S^2 \rangle$  in the triplet and singlet spin states for **SBDO-C**.

| Spin states       | $E / \text{au}$ | $\langle S^2 \rangle$ |
|-------------------|-----------------|-----------------------|
| $S = 1$ (triplet) | -1222.48767313  | 2.0007                |
| $S = 0$ (singlet) | -1222.48758900  | 0.2523                |

**Table S9.** The energy levels and  $\langle S^2 \rangle$  in the triplet and singlet spin states for **SBDO-Si**.

| Spin states       | $E / \text{au}$ | $\langle S^2 \rangle$ |
|-------------------|-----------------|-----------------------|
| $S = 1$ (triplet) | -1473.91657999  | 2.0006                |
| $S = 0$ (singlet) | -1473.91652825  | 0.2272                |

**Table S10.** The energy levels and  $\langle S^2 \rangle$  in the triplet and singlet spin states for **SBDO-Ge**.

| Spin states       | $E / \text{au}$ | $\langle S^2 \rangle$ |
|-------------------|-----------------|-----------------------|
| $S = 1$ (triplet) | -3261.37899748  | 2.0006                |
| $S = 0$ (singlet) | -3261.37893832  | 0.2277                |

**Table S11.** Selected molecular orbitals of the triplet state ( $S = 1$ ) and  $\alpha$  and  $\beta$  spins for **SBDO-C** (isovalue = 0.03). Red and blue filled cells represent the occupied and unoccupied MOs, respectively.

| MOs ( $\alpha$ spin) | $E / \text{eV}$ |                                                                                     | MOs ( $\beta$ spin) | $E / \text{eV}$ |                                                                                       |
|----------------------|-----------------|-------------------------------------------------------------------------------------|---------------------|-----------------|---------------------------------------------------------------------------------------|
| 105                  | -0.492          | 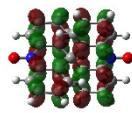   | 105                 | -0.331          |    |
| 104                  | -0.675          |    | 104                 | -0.579          |    |
| 103                  | -0.834          |    | 103                 | -0.742          |    |
| 102                  | -1.187          |  | 102                 | -1.070          |  |
| 101                  | -1.187          |  | 101                 | -1.070          |  |
| 100                  | -1.493          |  | 100                 | -1.419          |  |
| 99<br>(SOMO)         | -5.499          |  | 99                  | -3.020          |  |
| 98<br>(SOMO)         | -5.499          |  | 98                  | -3.020          |  |



|    |        |                                                                                     |    |        |                                                                                       |
|----|--------|-------------------------------------------------------------------------------------|----|--------|---------------------------------------------------------------------------------------|
| 97 | -6.940 | 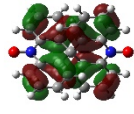   | 97 | -6.857 |    |
| 96 | -7.342 |    | 96 | -7.178 |    |
| 95 | -7.342 |    | 95 | -7.178 |    |
| 94 | -7.566 |    | 94 | -7.307 |    |
| 93 | -7.616 |  | 93 | -7.307 |  |
| 92 | -7.868 |  | 92 | -7.467 |  |
| 91 | -7.868 |  | 91 | -7.522 |  |
| 90 | -8.110 |  | 90 | -7.589 |  |
| 89 | -8.191 |  | 89 | -7.589 |  |

|    |        |                                                                                   |    |        |                                                                                     |
|----|--------|-----------------------------------------------------------------------------------|----|--------|-------------------------------------------------------------------------------------|
| 88 | -8.191 | 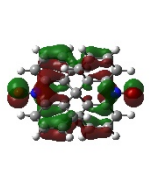 | 88 | -7.987 |  |
|----|--------|-----------------------------------------------------------------------------------|----|--------|-------------------------------------------------------------------------------------|

**Table S12.** Selected molecular orbitals of the triplet state ( $S = 1$ ) and  $\alpha$  and  $\beta$  spins for SBDO-Si (isovalue = 0.03). Red and blue filled cells represent the occupied and unoccupied MOs, respectively.

| MOs ( $\alpha$ spin) | $E / \text{eV}$ |                                                                                     | MOs ( $\beta$ spin) | $E / \text{eV}$ |                                                                                       |
|----------------------|-----------------|-------------------------------------------------------------------------------------|---------------------|-----------------|---------------------------------------------------------------------------------------|
| 109                  | -0.725          | 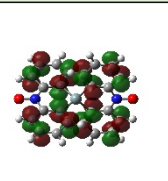   | 109                 | -0.630          |    |
| 108                  | -0.729          |   | 108                 | -0.643          |   |
| 107                  | -0.783          |  | 107                 | -0.670          |  |
| 106                  | -1.429          |  | 106                 | -1.350          |  |
| 105                  | -1.438          |  | 105                 | -1.382          |  |
| 104                  | -1.438          |  | 104                 | -1.382          |  |
| 103<br>(SOMO)        | -5.617          |  | 103                 | -3.091          |  |

|               |        |                                                                                     |     |        |                                                                                       |
|---------------|--------|-------------------------------------------------------------------------------------|-----|--------|---------------------------------------------------------------------------------------|
| 102<br>(SOMO) | -5.617 | 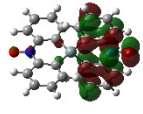   | 102 | -3.091 |    |
| 101           | -7.187 |    | 101 | -7.097 |    |
| 100           | -7.400 |    | 100 | -7.097 |    |
| 99            | -7.400 |   | 99  | -7.109 |   |
| 98            | -7.553 |  | 98  | -7.401 |  |
| 97            | -7.557 |  | 97  | -7.401 |  |
| 96            | -7.751 |  | 96  | -7.470 |  |
| 95            | -7.833 |  | 95  | -7.475 |  |
| 94            | -7.833 |  | 94  | -7.574 |  |

|    |        |  |    |        |  |
|----|--------|--|----|--------|--|
| 93 | -8.154 |  | 93 | -7.574 |  |
| 92 | -8.154 |  | 92 | -7.655 |  |

**Table S13.** Selected molecular orbitals of the triplet state ( $S = 1$ ) and  $\alpha$  and  $\beta$  spins for **SBDO-Ge** (isovalue = 0.03). Red and blue filled cells represent the occupied and unoccupied MOs, respectively.

| MOs ( $\alpha$ spin) | $E / \text{eV}$ |  | MOs ( $\beta$ spin) | $E / \text{eV}$ |  |
|----------------------|-----------------|--|---------------------|-----------------|--|
| 118                  | -0.721          |  | 118                 | -0.023          |  |
| 117                  | -0.735          |  | 117                 | -0.024          |  |
| 116                  | -0.835          |  | 116                 | -0.026          |  |
| 115                  | -1.326          |  | 115                 | -0.046          |  |
| 114                  | -1.336          |  | 114                 | -0.047          |  |
| 113                  | -1.336          |  | 113                 | -0.047          |  |

|               |        |                                                                                     |     |        |                                                                                       |
|---------------|--------|-------------------------------------------------------------------------------------|-----|--------|---------------------------------------------------------------------------------------|
| 112<br>(SOMO) | -5.605 | 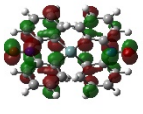   | 112 | -0.113 |    |
| 111<br>(SOMO) | -5.605 |    | 111 | -0.113 |    |
| 110           | -7.266 |    | 110 | -0.261 |    |
| 109           | -7.353 |   | 109 | -0.261 |   |
| 108           | -7.353 |  | 108 | -0.264 |  |
| 107           | -7.563 |  | 107 | -0.269 |  |
| 106           | -7.569 |  | 106 | -0.269 |  |
| 105           | -7.696 |  | 105 | -0.275 |  |
| 104           | -7.817 |  | 104 | -0.275 |  |

|     |        |                                                                                   |     |        |                                                                                     |
|-----|--------|-----------------------------------------------------------------------------------|-----|--------|-------------------------------------------------------------------------------------|
| 103 | -7.817 | 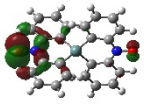 | 103 | -0.278 |  |
| 102 | -8.117 |  | 102 | -0.278 |  |
| 101 | -8.117 |  | 101 | -0.279 |  |

**Table S14.** Spin densities for **SBDO-C**, **SBDO-Si** and **SBDO-Ge**.

| 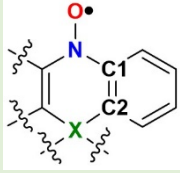 | SBDO-C | SBDO-Si | SBDO-Ge |
|-------------------------------------------------------------------------------------|--------|---------|---------|
| O                                                                                   | +0.450 | +0.474  | +0.436  |
| N                                                                                   | +0.362 | +0.351  | +0.344  |
| C1                                                                                  | -0.118 | -0.119  | -0.129  |
| C2                                                                                  | +0.149 | +0.152  | +0.203  |
| X                                                                                   | -0.054 | -0.030  | -0.070  |

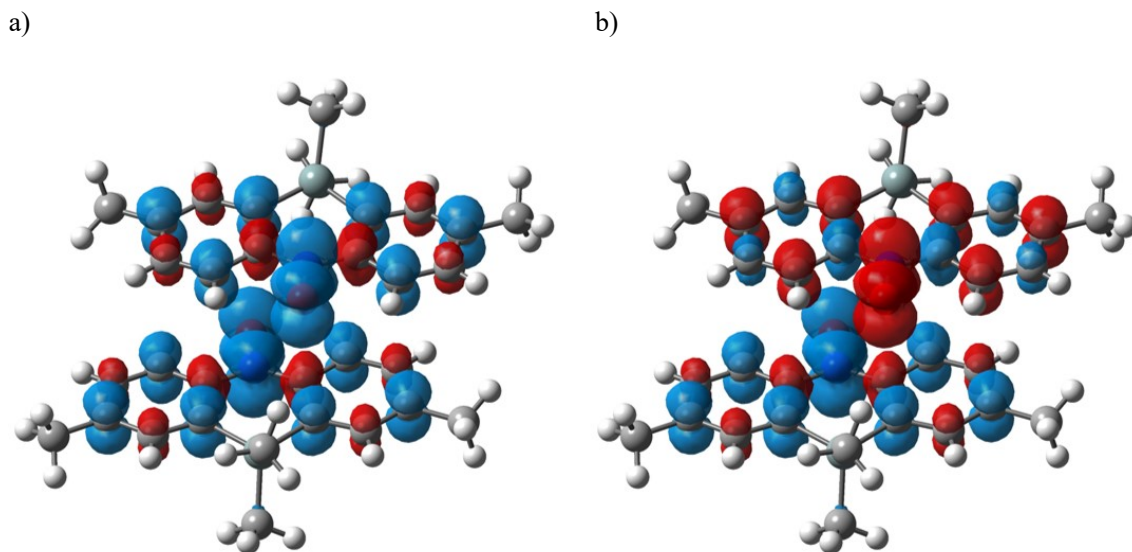

**Fig. S11.** Spin density maps drawn from the DFT MO calculations accompanied with the intermolecular contacts (N2 $\cdots$ C41 and N3 $\cdots$ C21) in **1-Si** in the (a) triplet and (b) singlet states. The geometrical parameters are from the crystallographic results. Blue and red lobes stand for positive and negative spin densities, respectively, with the isocontour of 0.002 e  $\text{\AA}^{-3}$ .

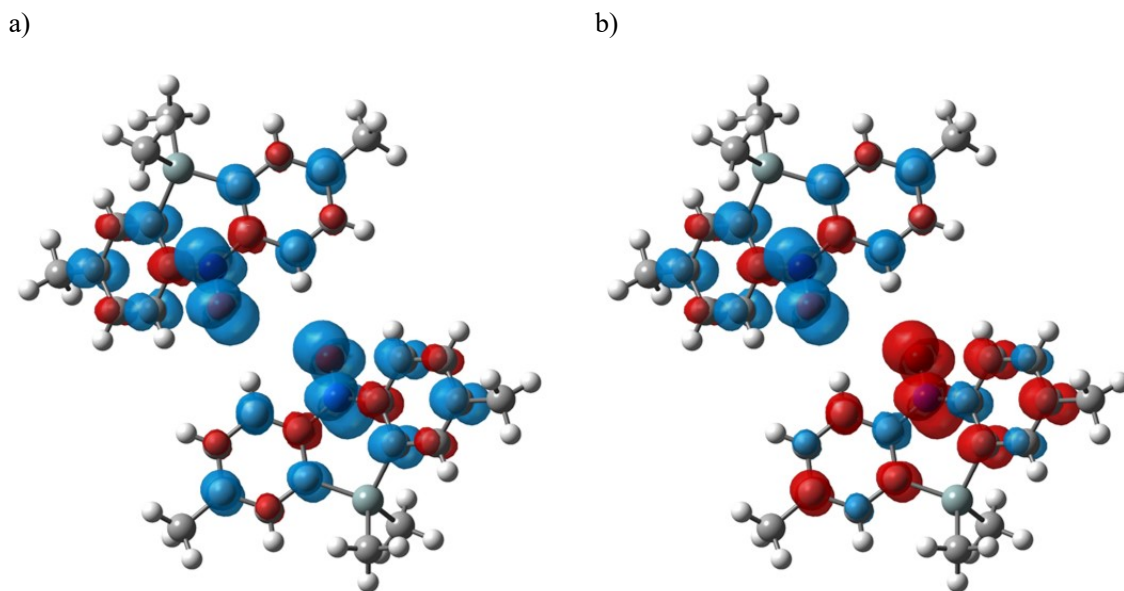

**Fig. 12.** Spin density maps drawn from the DFT MO calculations accompanied with the intermolecular contact (O1 $\cdots$ O4) in **1-Si** in the (a) triplet and (b) singlet states. The geometrical parameters are from the crystallographic results. Blue and red lobes stand for positive and negative spin densities, respectively, with the isocontour of 0.002 e  $\text{\AA}^{-3}$ .

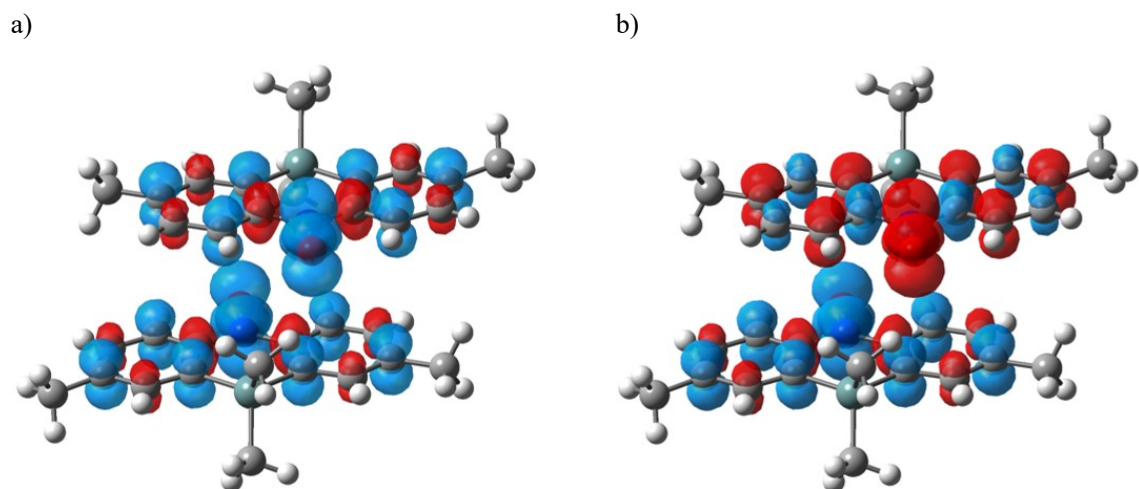

**Fig. S13.** Spin density maps drawn from the DFT MO calculations accompanied with the intermolecular contacts (O2···C21 and N2···C22) in **1-Ge** in the (a) triplet and (b) singlet states. The geometrical parameters are from the crystallographic results. Blue and red lobes stand for positive and negative spin densities, respectively, with the isocontour of  $0.002 \text{ e } \text{\AA}^{-3}$ .



### Magnetic measurements

The direct current magnetic susceptibilities of **1-Si** and **1-Ge** were measured on a Quantum Design MPMS-XL7AC SQUID magnetometer equipped with a 7 T coil in a temperature range of 2–300 K under the static field of 0.5 T. The magnetic data were corrected using diamagnetic blank data of the sample holder measured. The diamagnetic contribution of the sample itself was estimated from Pascal's constants.<sup>S6</sup>

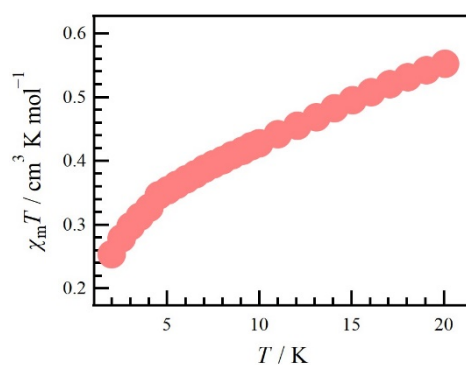

**Fig. S14.** Temperature dependence of the product  $\chi_m T$  for **1-Si** in the temperature range of 2–20 K.

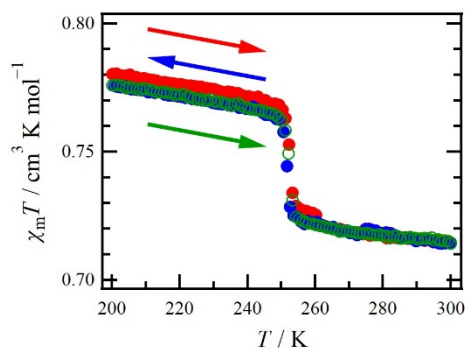

**Fig. S15.** Temperature dependence of the product  $\chi_m T$  for **1-Ge**, The red, blue and green colours represent the 1st heating, 1st cooling and 2nd heating processes, respectively.



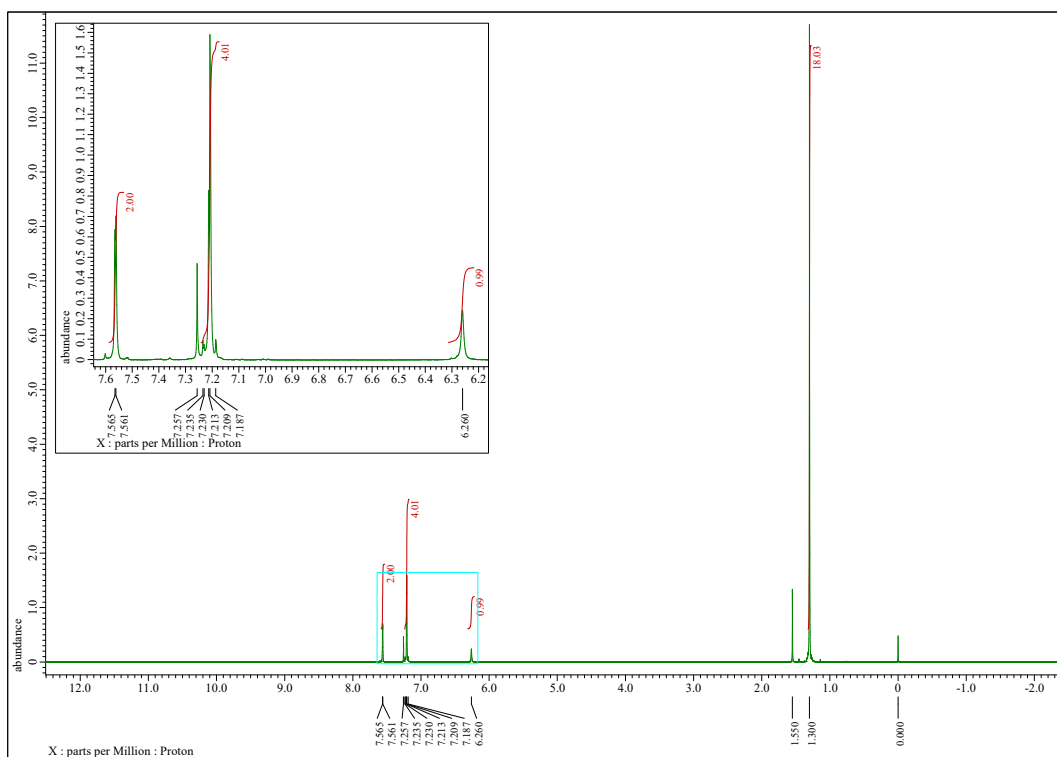

Fig. S16.  $^1\text{H}$  NMR spectrum for **2**.

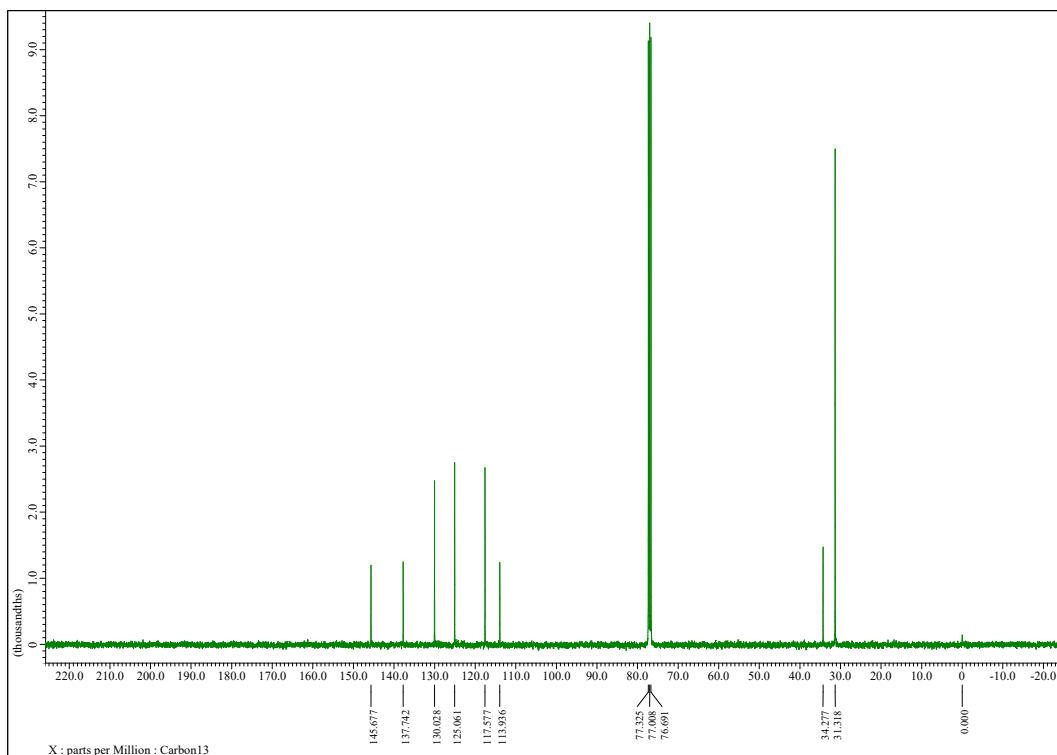

Fig. S17.  $^{13}\text{C}$  NMR spectrum for **2**.

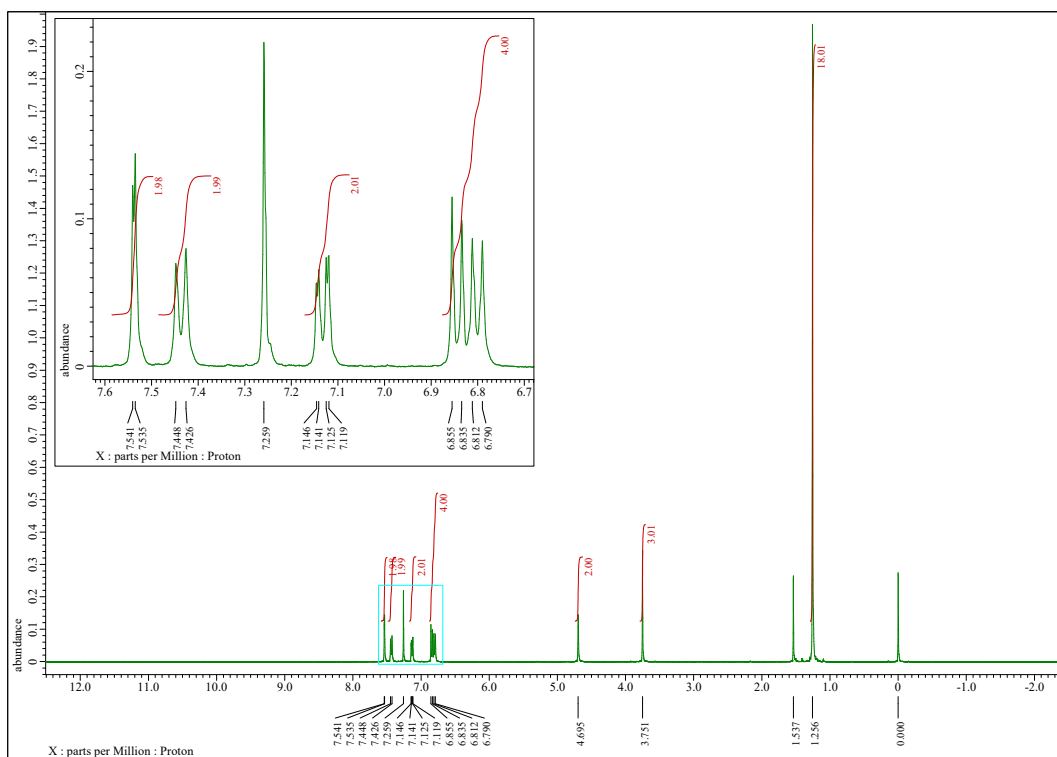

**Fig. S18.** <sup>1</sup>H NMR spectrum for **3**.

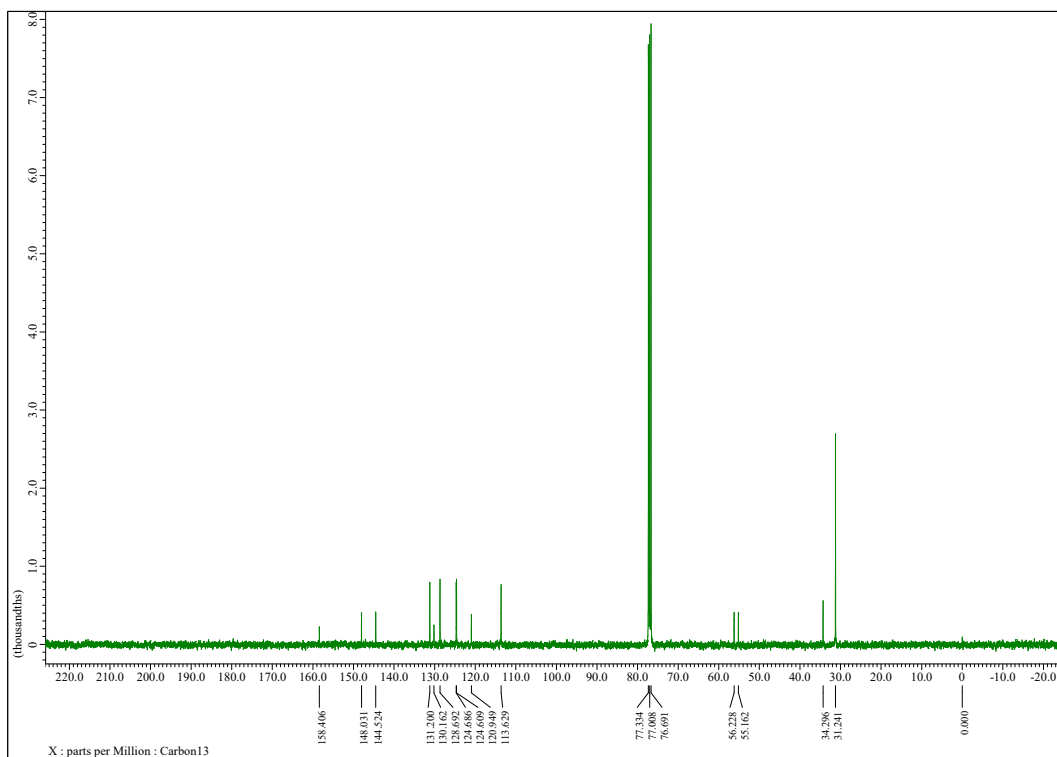

**Fig. S19.** <sup>13</sup>C NMR spectrum for **3**.

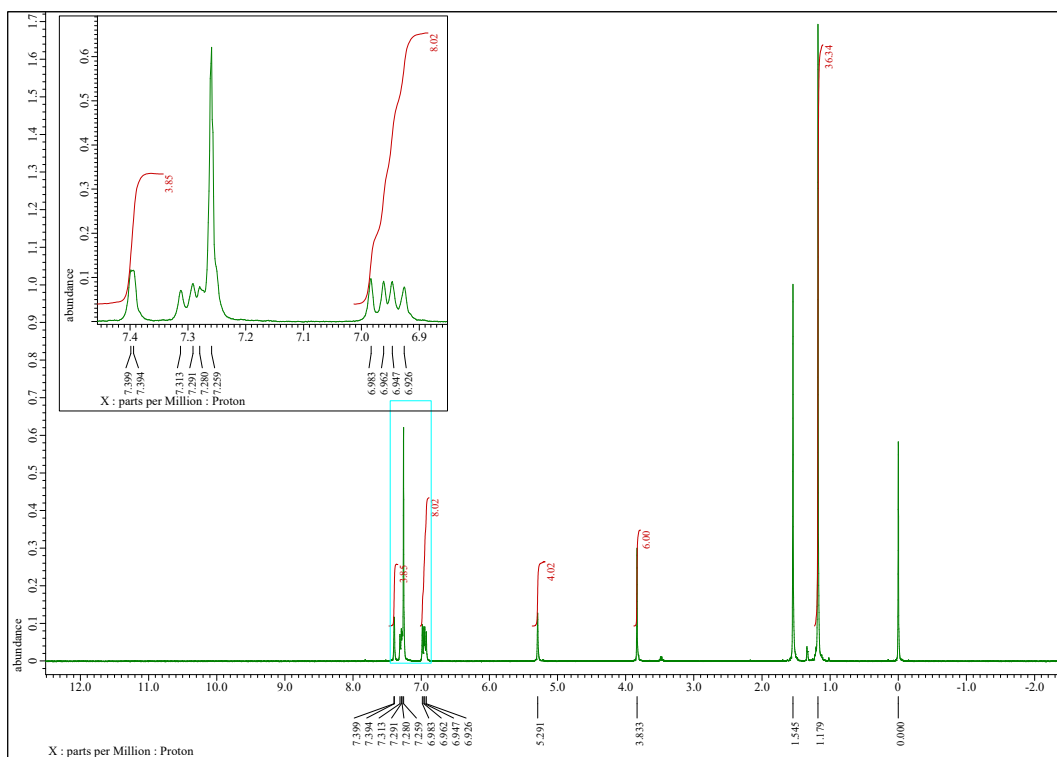

**Fig. S20.** <sup>1</sup>H NMR spectrum for 4-Si.

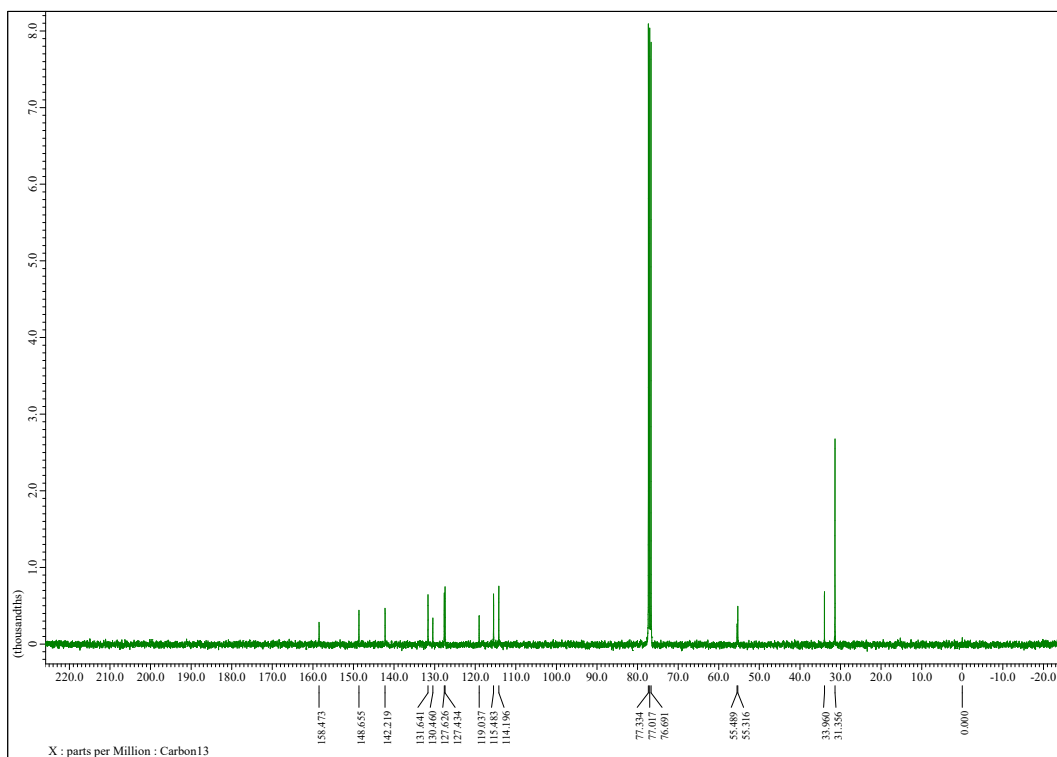

**Fig. S21.** <sup>13</sup>C NMR spectrum for 4-Si.

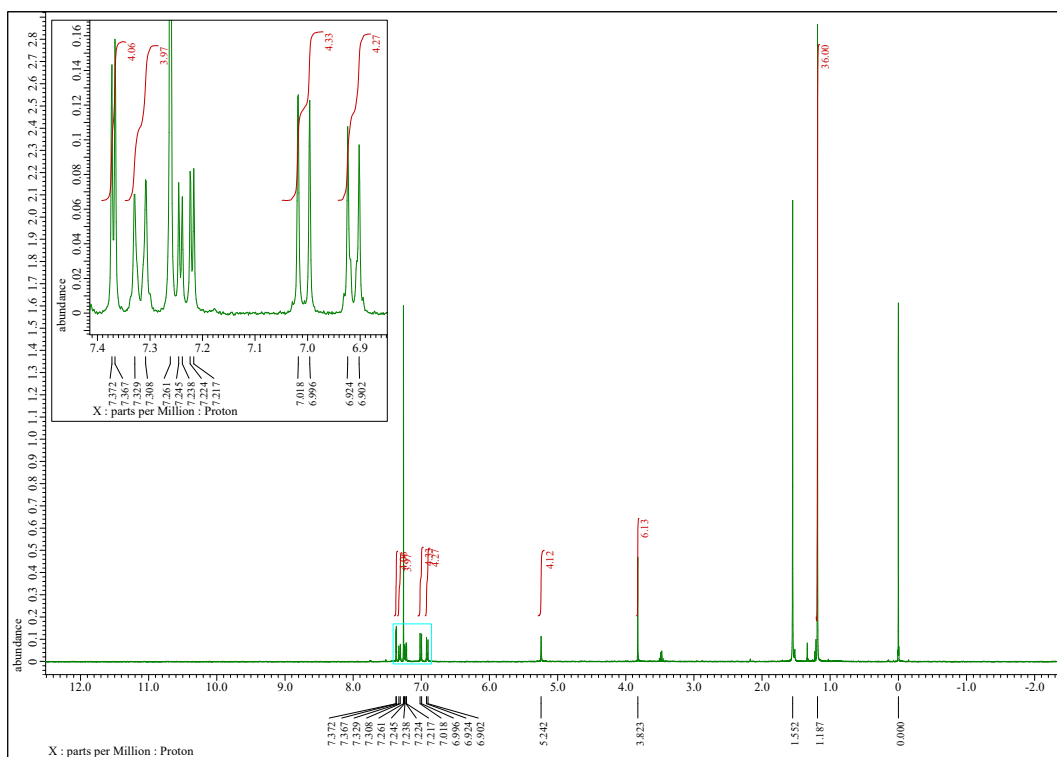

**Fig. S22.** <sup>1</sup>H NMR spectrum for 4-Ge.

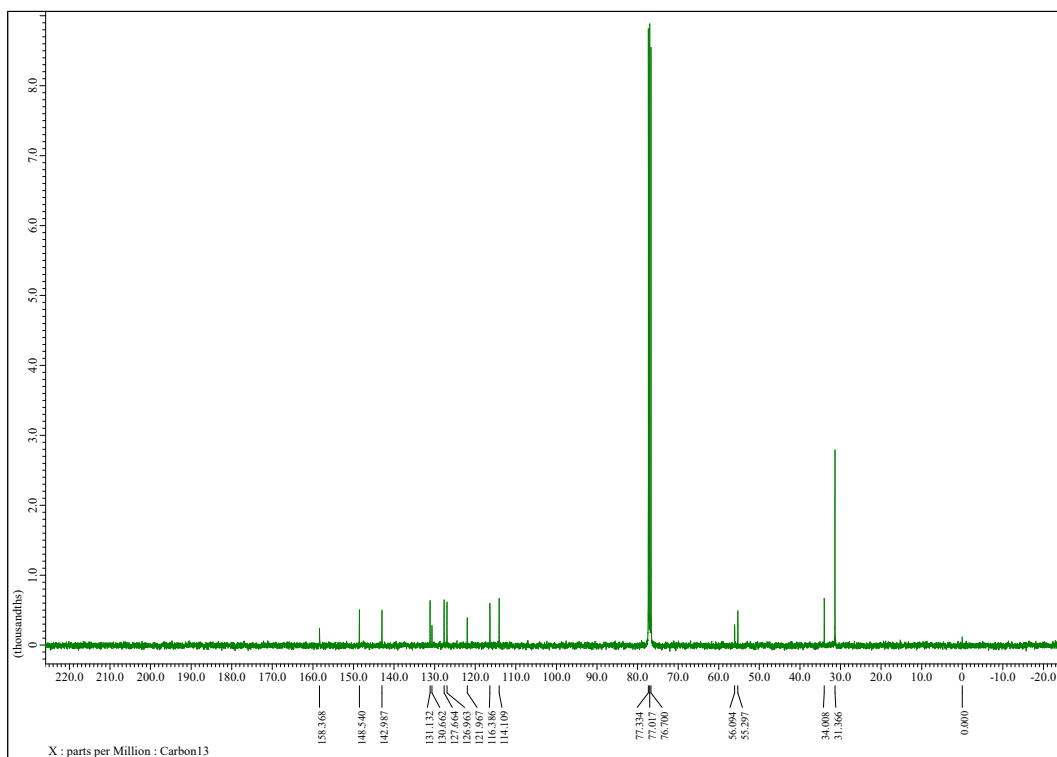

**Fig. S23.** <sup>13</sup>C NMR spectrum for 4-Ge.

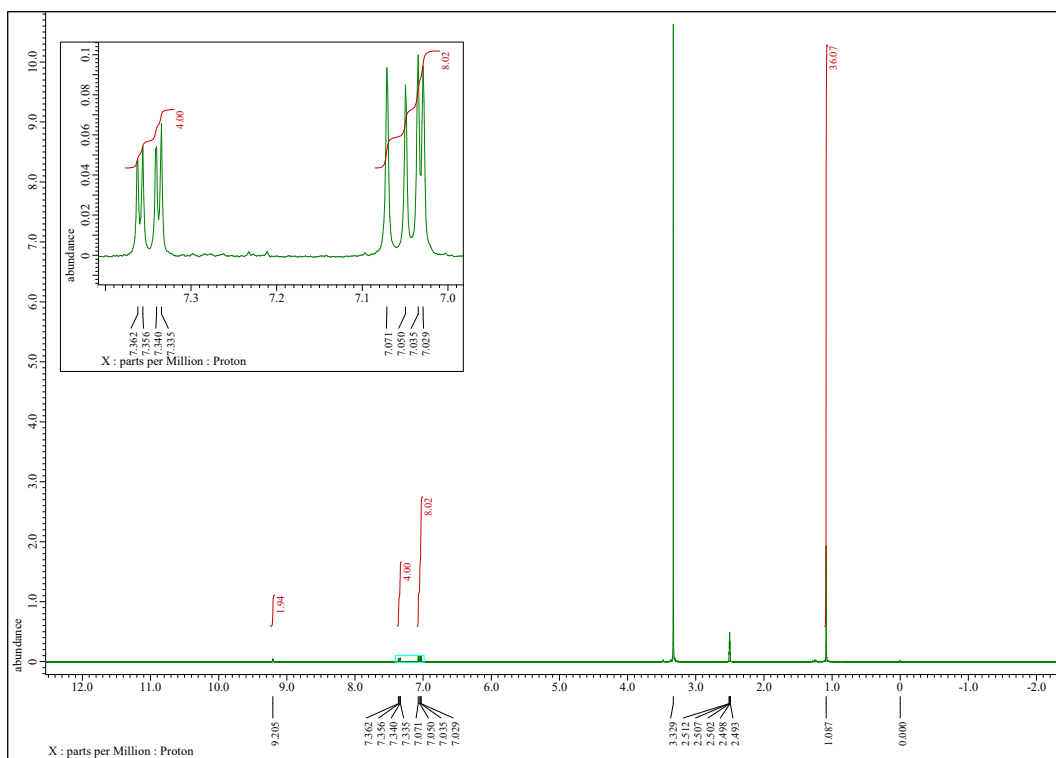

Fig. S24.  $^1\text{H}$  NMR spectrum for 5-Si.

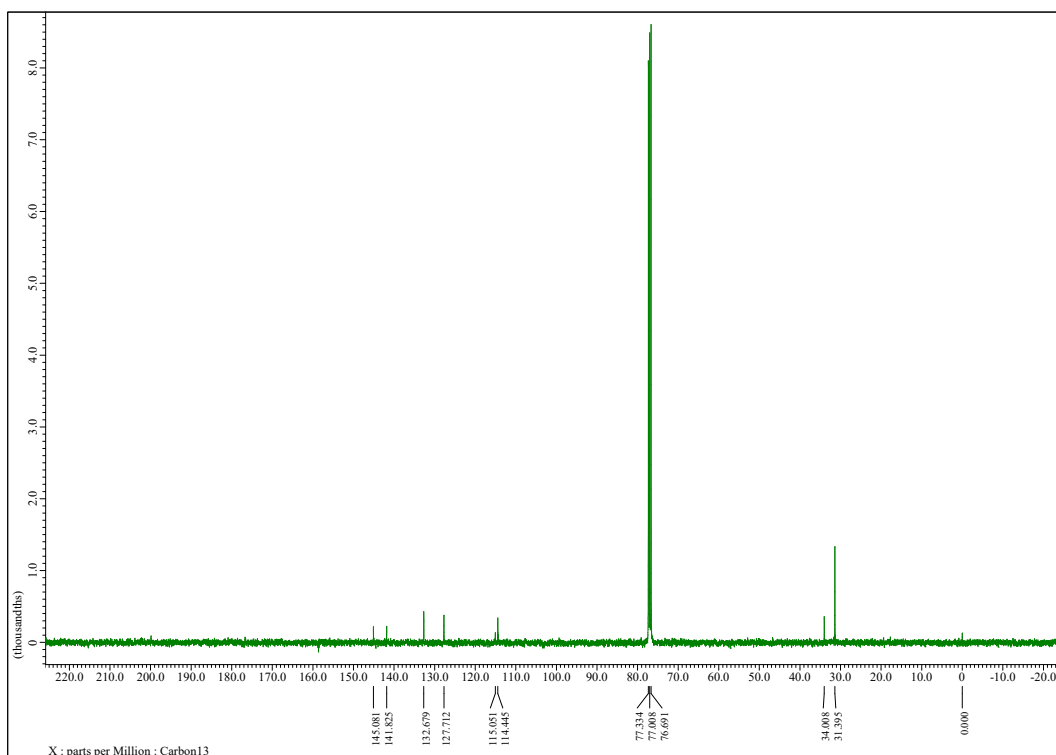

Fig. S25.  $^{13}\text{C}$  NMR spectrum for 5-Si.

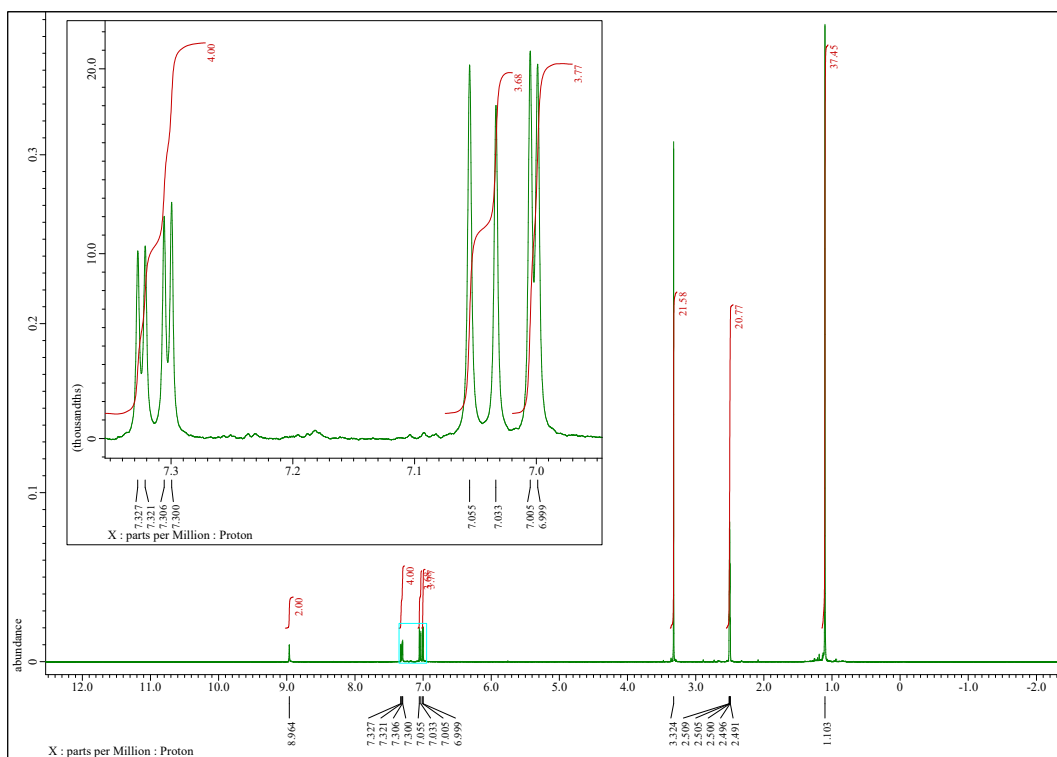

**Fig. S26.** <sup>1</sup>H NMR spectrum for **5-Ge**.

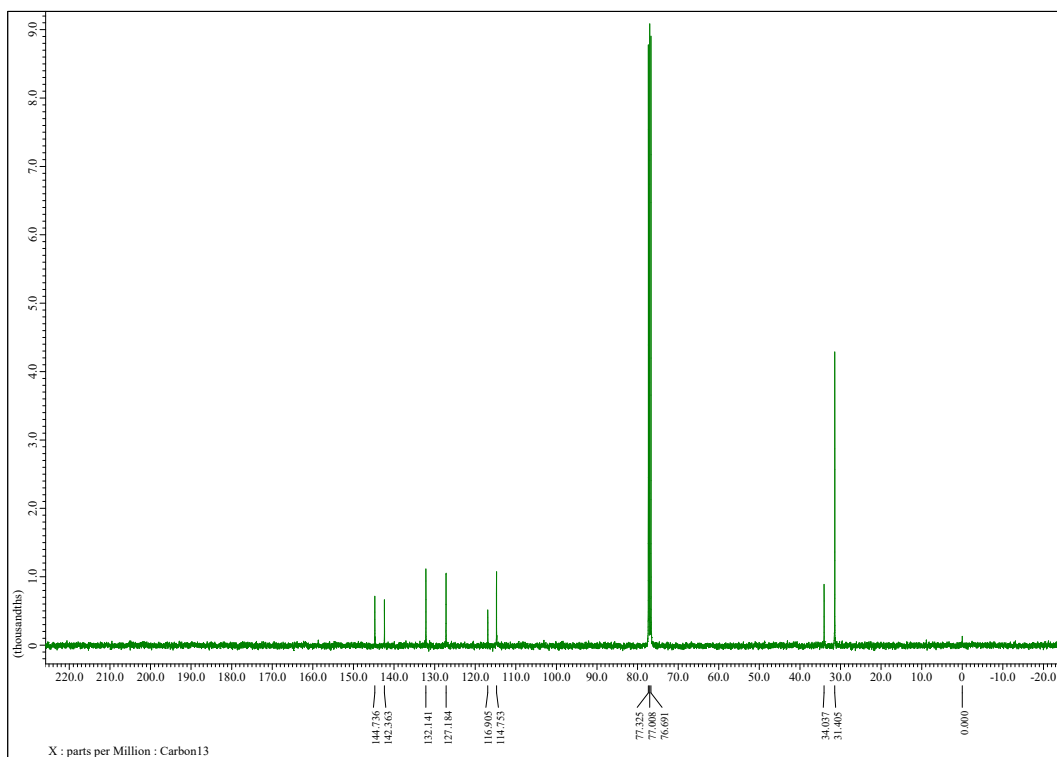

**Fig. S27.** <sup>13</sup>C NMR spectrum for **5-Ge**.



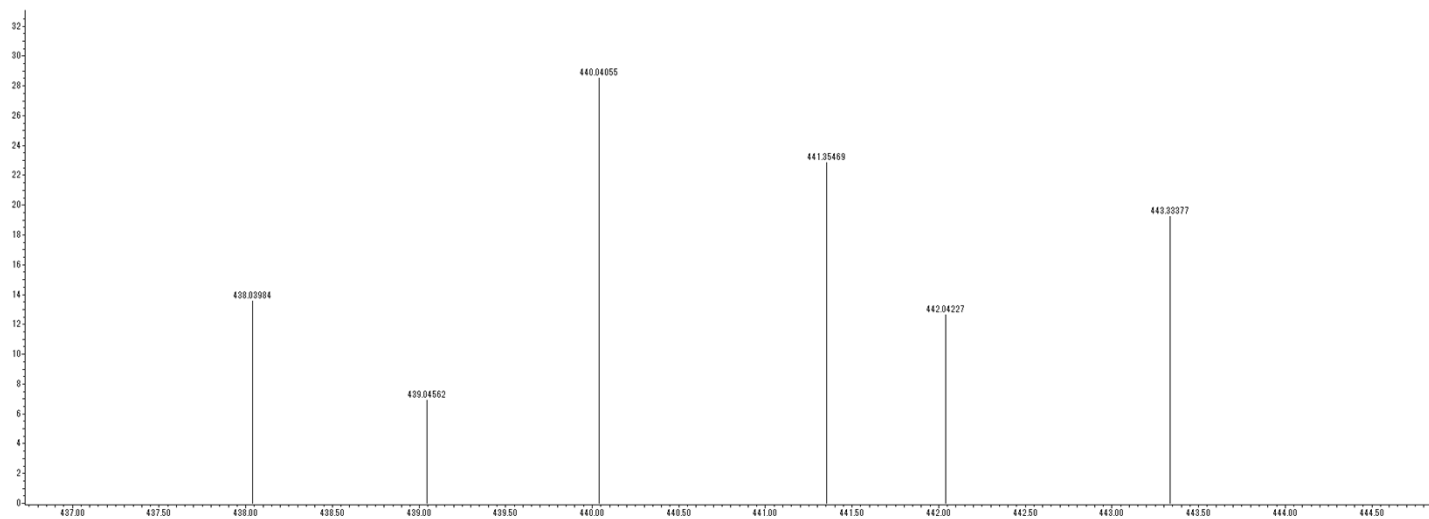

Fig. S28. HRMS spectrum of 2.

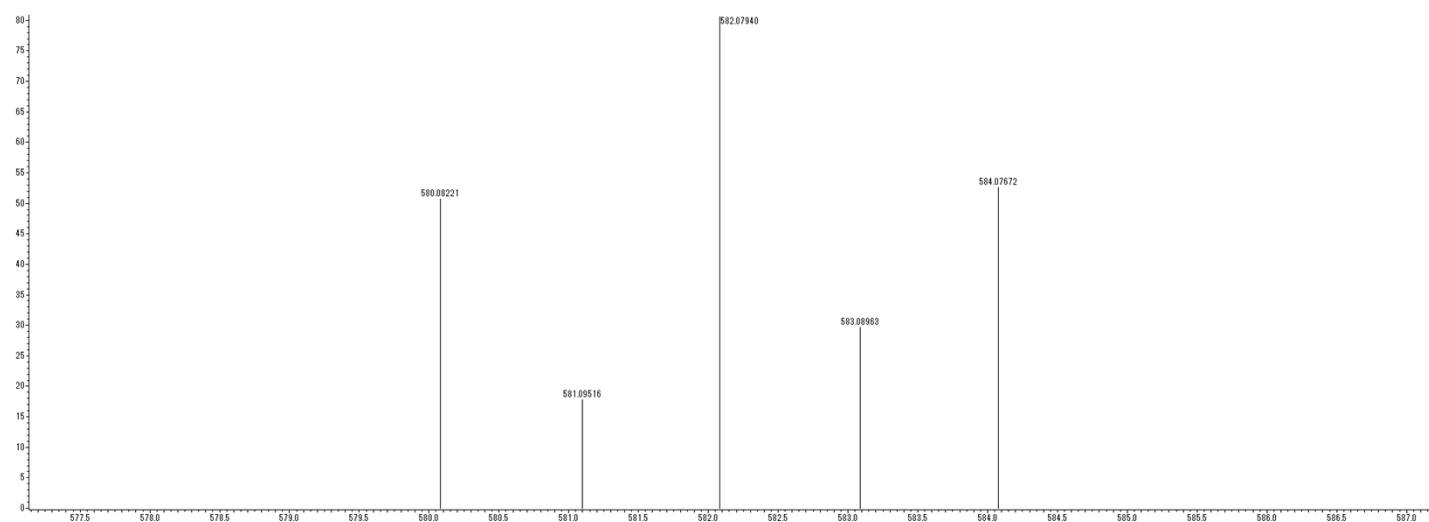

Fig. S29. HRMS spectrum of 3.

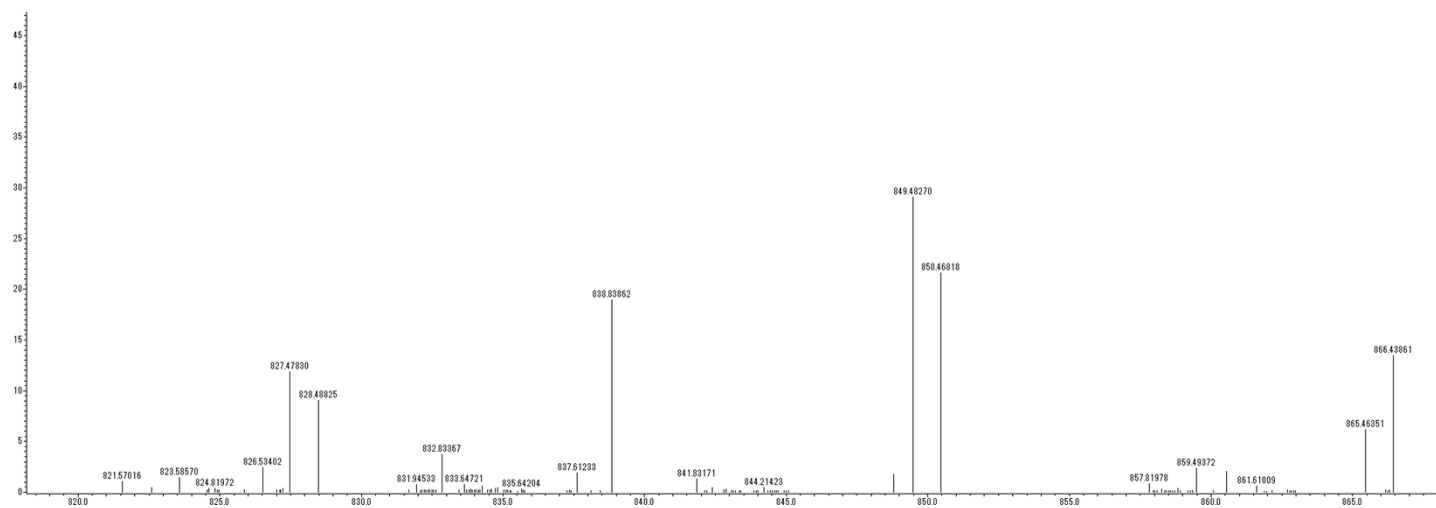

Fig. S30. HRMS spectrum of 4-Si.

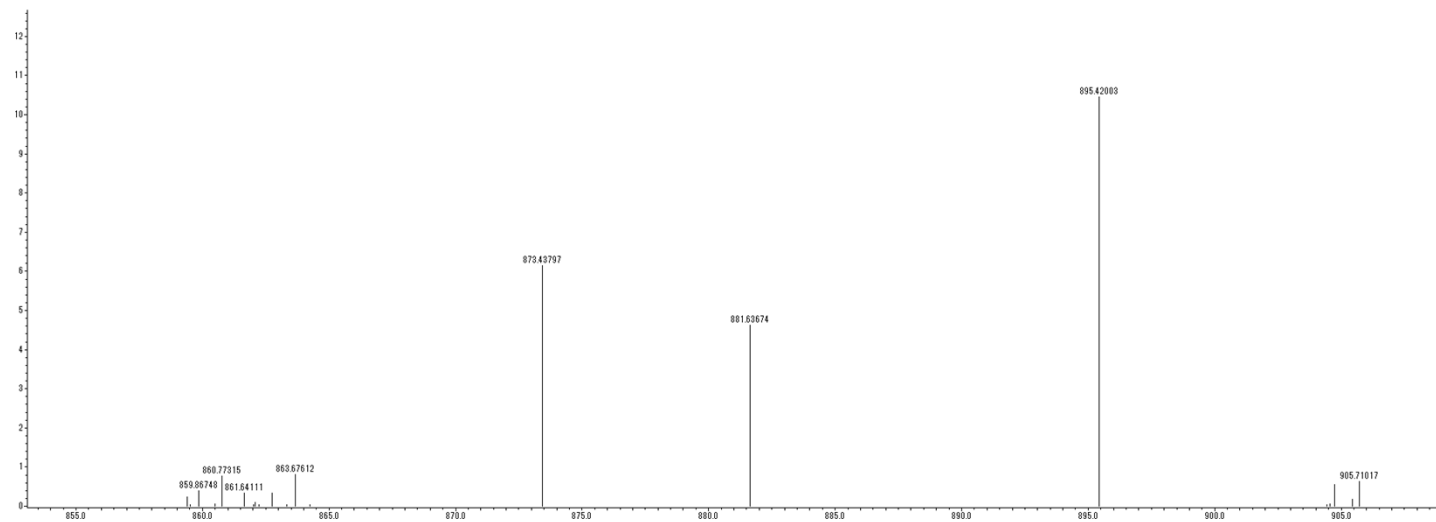

Fig. S31. HRMS spectrum of 4-Ge.

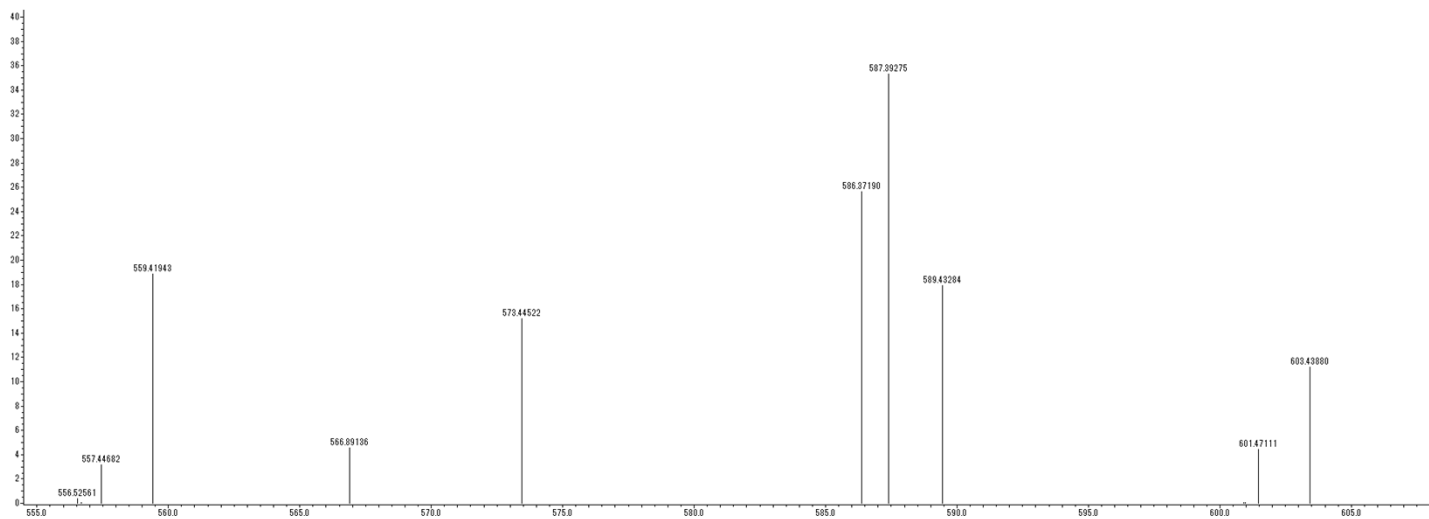

Fig. S32. HRMS spectrum of 5-Si.

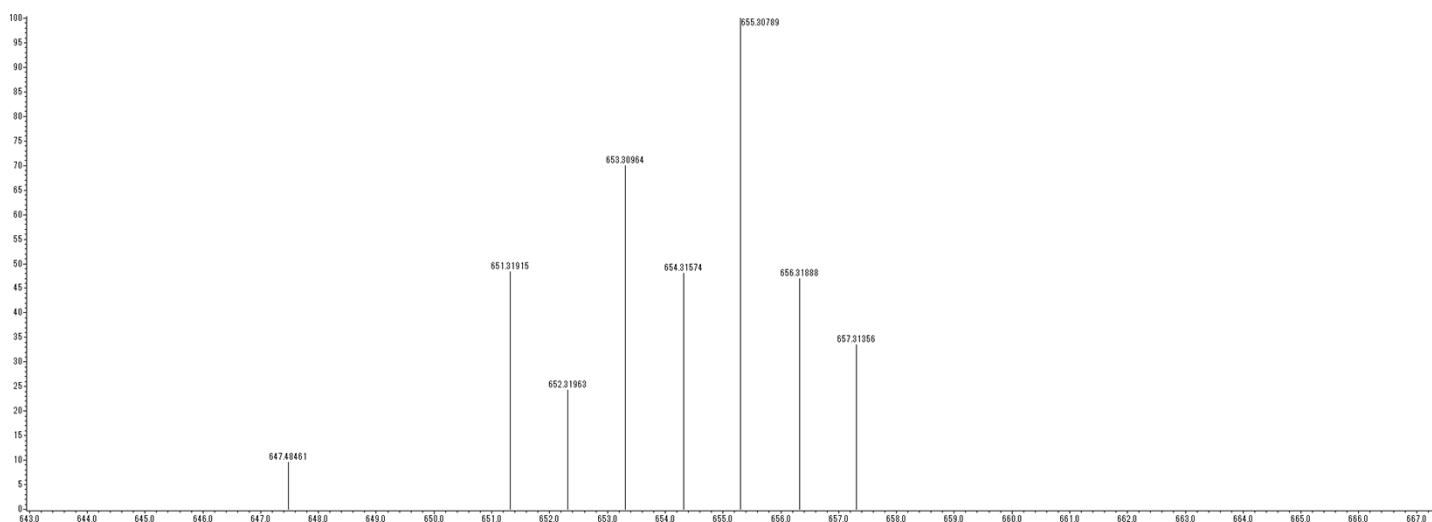

Fig. S33. HRMS spectrum of 5-Ge.

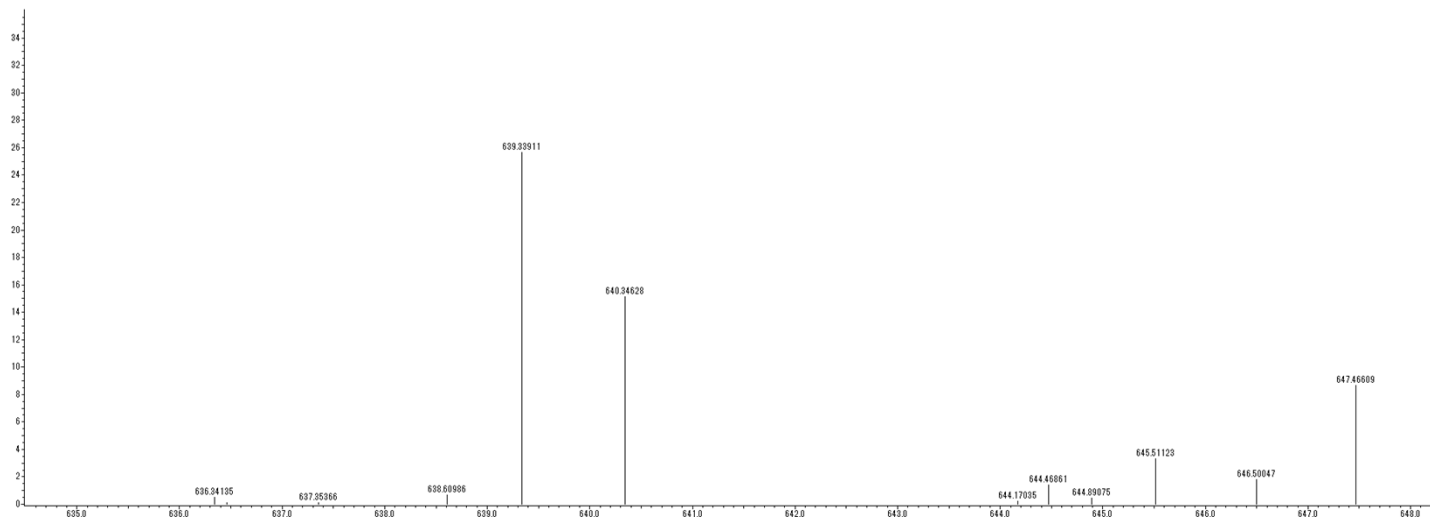

Fig. S34. HRMS spectrum of 1-Si.

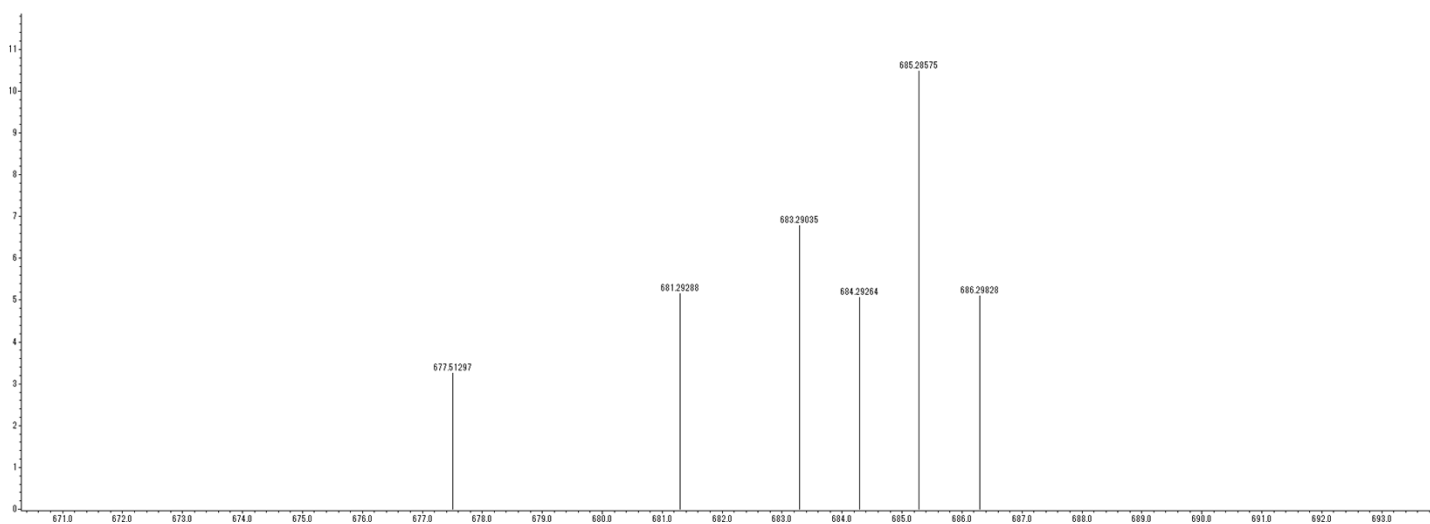

Fig. S35. HRMS spectrum of 1-Ge.

## References

- S1. G. M. Sheldrick, SHELXT – Integrated space-group and crystal structure determination, *Acta Cryst.*, 2015, **A71**, 3–8.
- S2. G. M. Sheldrick, Crystal structure refinement with SHELXL, *Acta Cryst.*, 2015, **C71**, 3–8.
- S3. L. J. Bourhis, O. V. Dolomanov, R. J. Gildea, J. A. K. Howard and H. Puschmann, The anatomy of a comprehensive constrained, restrained refinement program for the modern computing environment – *Olex2* dissected, *Acta Cryst.*, 2015, **A71**, 59–75.
- S4. T. Kanetomo, K. Ichihashi, M. Enomoto and T. Ishida, Ground Triplet Spirobiradical: 2,2',7,7'-Tetra(*tert*-butyl)-9,9'(10*H*,10'*H*)-spirobiacridine-10,10'-dioxyl, *Org. Lett.*, 2019, **21**, 3909–3912.
- S5. M. J. Frisch, G. W. Trucks, H. B. Schlegel, G. E. Scuseria, M. A. Robb, J. R. Cheeseman, G. Scalmani, V. Barone, B. Mennucci, G. A. Petersson, H. Nakatsuji, M. Caricato, X. Li, H. P. Hratchian, A. F. Izmaylov, J. Bloino, G. Zheng, J. L. Sonnenberg, M. Hada, M. Ehara, K. Toyota, R. Fukuda, J. Hasegawa, M. Ishida, T. Nakajima, Y. Honda, O. Kitao, H. Nakai, T. Vreven, J. A. Montgomery Jr., J. E. Peralta, F. Ogliaro, M. Bearpark, J. J. Heyd, E. Brothers, K. N. Kudin, V. N. Staroverov, R. Kobayashi, J. Normand, K. Raghavachari, A. Rendell, J. C. Burant, S. S. Iyengar, S. S. J. Tomasi, M. Cossi, N. Rega, J. M. Millam, M. Klene, J. E. Knox, J. B. Cross, V. Bakken, C. Adamo, J. Jaramillo, R. Gomperts, R. E. Stratmann, O. Yazyev, A. J. Austin, R. Cammi, C. Pomelli, J. W. Ochterski, R. L. Martin, K. Morokuma, V. G. Zakrzewski, G. A. Voth, P. Salvador, J. J. Dannenberg, S. Dapprich, A. D. Daniels, O. Farkas, J. B. Foresman, J. V. Ortiz, J. Cioslowski, and D. J. Fox, Gaussian09, Revision A.02; Gaussian, Inc.: Wallingford, CT, 2009.
- S6. O. Kahn, *Molecular Magnetism*, VCH-Verlag, Weinheim, New York, 1993.
